# Supplementary material
Source: PubMed Central journal article supplement (PMC4672766)
Supplement: pnas.1515240112.sapp.pdf [file pnas.1515240112.sapp.pdf]

## Supporting Information

### Critical Role of *Chlamydomonas reinhardtii* Ferredoxin-5 in Maintaining Membrane Structure and Dark Metabolism

Wenqiang Yang<sup>a,1,2</sup>, Tyler M. Wittkopp<sup>a, b,1</sup>, Xiaobo Li<sup>a</sup>, Jaruswan Warakanont<sup>c</sup>, Alexandra Dubini<sup>d</sup>, Claudia Catalanotti<sup>a</sup>, Rick G. Kim<sup>a,b</sup>, Eva C. M. Nowack<sup>a</sup>, Luke C.M. Mackinder<sup>a</sup>, Munevver Aksoy<sup>a</sup>, Mark Dudley Page<sup>e</sup>, Sarah D'Adamo<sup>f</sup>, Shai Saroussi<sup>a</sup>, Mark Heinnickel<sup>a</sup>, Xenie Johnson<sup>a,g</sup>, Pierre Richaud<sup>g</sup>, Jean Alric<sup>a,g</sup>, Marko Boehm<sup>d</sup>, Martin C. Jonikas<sup>a</sup>, Christoph Benning<sup>h</sup>, Sabeeha S. Merchant<sup>e,i</sup>, Matthew C. Posewitz<sup>f</sup>, Arthur R. Grossman<sup>a</sup>

<sup>1</sup>*W.Y. and T.M.W. contributed equally to this work.*

<sup>a</sup>Department of Plant Biology, Carnegie Institution for Science, Stanford, CA 94305, USA

<sup>b</sup>Department of Biology, Stanford University, Stanford, CA 94305, USA

<sup>c</sup>Department of Plant Biology, Michigan State University, East Lansing, MI 48824, USA

<sup>d</sup>National Renewable Energy Laboratory, Golden, CO 80401, USA

<sup>e</sup>Department of Chemistry and Biochemistry, University of California, Los Angeles, CA 90095, USA

<sup>f</sup>Department of Chemistry and Geochemistry, Colorado School of Mines, Golden, CO 80401, USA

<sup>g</sup>Commissariat à l'Énergie Atomique, Centre National de la Recherche Scientifique, Aix-Marseille Université, Cadarache, Saint-Paul-lez-Durance, F-13108, France

<sup>h</sup>MSU-DOE-Plant Research Laboratory, Michigan State University, East Lansing, MI 48824

<sup>i</sup>Institute of Genomics and Proteomics, University of California, Los Angeles, CA 90095, USA

<sup>2</sup>*To whom correspondence should be addressed. Email: wenqiangy@gmail.com*

# SI APPENDIX

## SI Materials and Methods

### Southern Blot analysis

Genomic DNA (gDNA) was isolated and purified using a standard phenol-chloroform extraction from 50 ml liquid cultures, digested with various restriction enzymes and the DNA fragments resolved by agarose (0.8%) gel electrophoresis, and then blotted for 20 h in SSC onto nylon membranes (Bio-Rad, Hercules, CA). Transferred DNA was cross-linked, with hybridizations performed as previously described<sup>1</sup>. The *AphVIII* ORF (805 bp) and *FDX5*-specific DNA fragments (315 bp) were amplified with primers APH8-F1/APH8-R1 and FDX5-F4/ FDX5-R4 (see **SI Appendix, Table S2**) and used as hybridization probes. To visualize hybridizing bands, blots were exposed to a phosphor screen (Molecular Dynamics) and imaged using a Pharos FX Plus scanner with Quantity One software (Bio-Rad).

### pLM005\_Venus constructs and transformation

The *FDX5*, *CrΔ4FAD* and *CrFAD6* genes were amplified from cDNAs and cloned into pLM005\_Venus by Gibson assembly cloning<sup>2,3</sup> to generate pLM005FDX5\_Venus, pLM005CrΔ4FAD\_Venus, and pLM005CrFAD6\_Venus with various regulatory regions, as noted in the text. The constructs were transformed into cMJ030 (CC-4533) and transformants identified based on fluorescence outputs of individual colonies, and localized as previously described<sup>2,4</sup>.

### Thylakoid membrane purification

Cells were grown to exponential phase in the light and dark and thylakoids purified as previously described<sup>5</sup>.

### Membrane inlet mass spectrometry (MIMS)

MIMS was used to differentiate between O<sub>2</sub> consumption and evolution in the light<sup>6</sup>. WT and mutant cell suspensions were equilibrated with equimolar concentrations of <sup>18</sup>O<sub>2</sub> and <sup>16</sup>O<sub>2</sub>. Dark respiration was measured for 1-2 min prior to illuminating samples with white actinic light (~500 μmol photons m<sup>-2</sup> s<sup>-1</sup>); O<sub>2</sub> evolution and consumption were calculated as previously described<sup>6</sup>.

### *In vivo* photosynthetic measurements

The quantum yield of PSII (ΦPSII; F<sub>v</sub>/F<sub>m</sub>) and electron transport rates (ETR) were determined using a Walz DUAL-PAM 100 fluorometer, as described by the manufacturer.

### Chlorophyll fluorescence measurements

Whole cell Chl fluorescence measurements were performed using a Bio-Logic JTS-10 spectrophotometer with and without the addition of inhibitors [10 μM 3-(3,4-dichloroprenyl)-1-1-dimethylurea (DCMU)] and electron acceptors [1 mM methyl viologen (MV)].

#### P700 determination

PSI was measured by monitoring absorption changes at 705 nm in the presence of PSII inhibitors (10  $\mu$ M DCMU and 1 mM HA) during a brief period of illumination at 165  $\mu$ mol photons  $m^{-2} s^{-1}$ . A saturating pulse was provided after 5 sec of illumination to oxidize all P700. In some cases, 1 mM methyl viologen (MV) was added as an acceptor of electrons from PSI.

#### Protein isolation, SDS-PAGE and immunoblot analysis

Cells were stored at  $-80^{\circ}C$ , prior to resolution of proteins by SDS-PAGE<sup>7</sup>. The resolved proteins were immunoblotted, probed with specific antibodies and detected using the secondary antibody horseradish peroxidase-conjugated anti-rabbit IgG (Promega, Madison, WI); peroxidase activity was detected by an enhanced chemiluminescence assay (ECL) (Amersham Biosciences, GE Healthcare, Piscataway, NJ).

#### Pull-Down assay

FDX5 was coupled to cyanogen bromide (CnBr)-activated sepharose beads (GE Healthcare, USA; 5 mg of protein per ml resin) and prepared according to the manufacturer's instruction. The pull-down assay was performed as described previously<sup>8</sup>.

#### Mass-Spectrometry analysis

Protein samples (25  $\mu$ g) were protease treated and the resulting peptides were analyzed by reverse phase chromatography using a Waters nanoAcquity UPLC pump coupled online to an LTQ/Orbitrap mass spectrometer described as previously<sup>8</sup> and blasted to the proteins encoded by the *Chlamydomonas* genome<sup>9</sup>.

## SI Appendix Figures

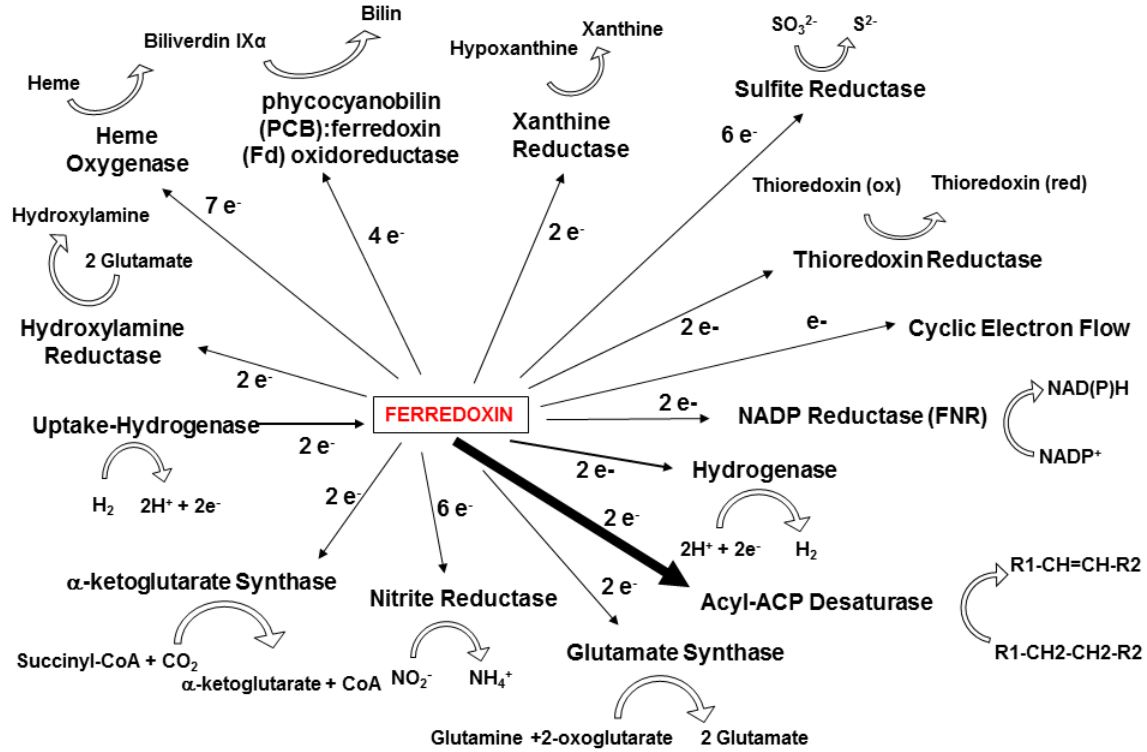

**Fig. S1.** Ferredoxin-mediated electron transfer reactions. Ferredoxins participate in a variety of electron transfer reactions, including those depicted; these reactions require donation of between 1 (CEF) and 7 (heme oxygenase) electrons. The transfer of electrons from ferredoxins to desaturases is highlighted by a thicker arrow since it is most relevant to the research presented.

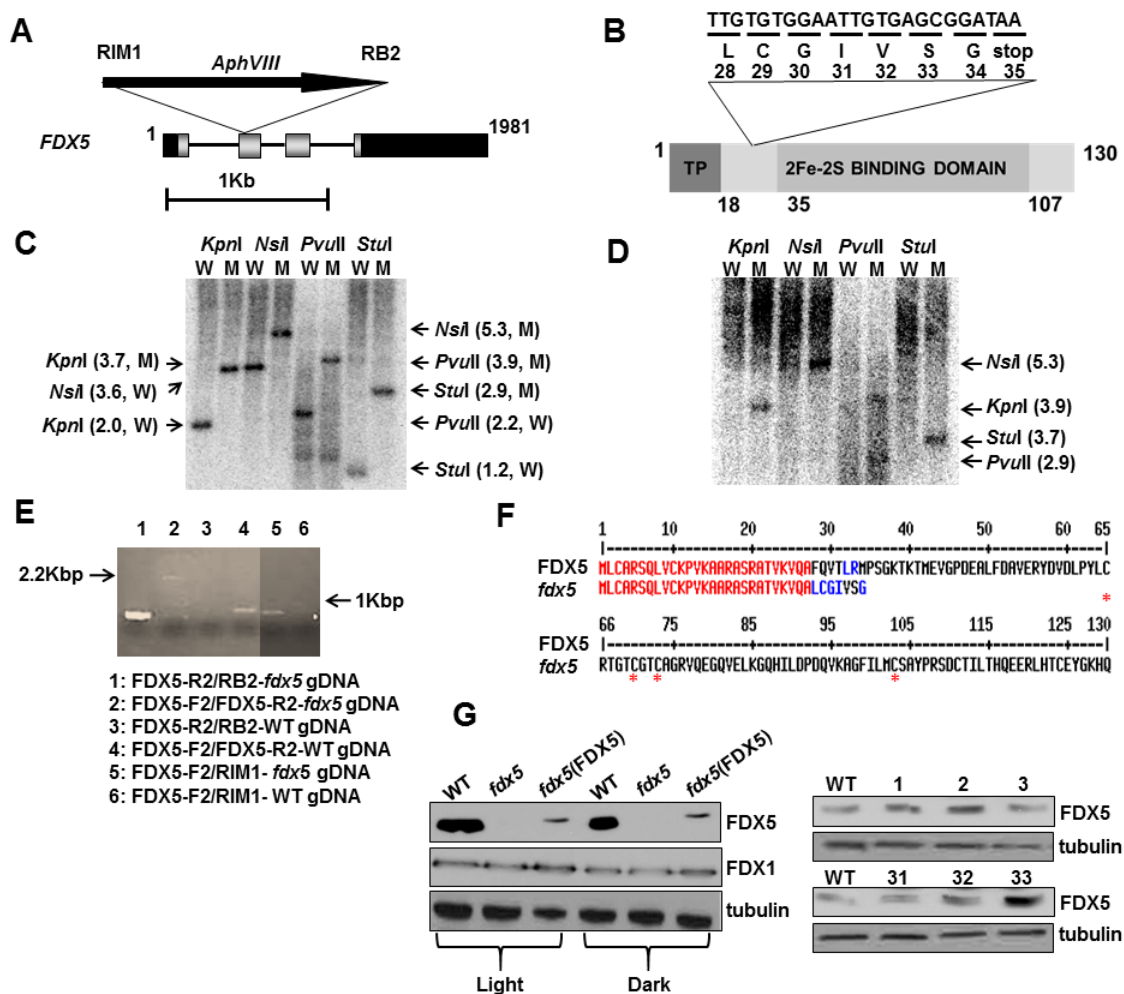

**Fig. S2.** Generation and molecular analyses of *fdx5* mutant. (A) Representation of the site of insertion of the *AphVIII* gene in the *fdx5* mutant. Black boxes represent 5' and 3'UTRs, grey boxes and black lines represent exons and introns, respectively. The arrow indicates the orientation of the insertion while the sites of primer annealing used to sequence from the cassette into the *Chlamydomonas* genome are designated RIM1 and RB2. (B) Diagram showing structure of FDX5 protein and the predicted amino acid sequence that precedes the site of translation termination of the protein in the *fdx5* mutant. TP is the chloroplast targeting transit peptide while the light grey box represents the domain that binds the 2Fe-2S cluster. The site of insertion, at amino acid 28, is indicated along with the amino acids introduced by the insertion, ending with a stop codon. (C) Southern blot hybridization analysis of genomic DNA from the *fdx5* mutant. The membrane with the transferred DNA was incubated with a radiolabeled probe containing the entire FDX5 nucleotide sequence. Sizes of the hybridizing fragments are given on both sides of the blot (in Kbp). W and M represent WT and *fdx5* mutant strains, respectively. (D) Southern blot hybridization of genomic DNA from *fdx5* mutant using an *AphVIII* gene probe. The sizes of the hybridizing fragments are given to the right of the blot (in Kbp). (E) PCR with specific primers and genomic DNA (gDNA) as template was used to identify the *AphVIII* insertion site. The products generated using gDNA from WT and *fdx5* are shown. The primer pairs and templates used were: 1. FDX5-R2/RB2-*fdx5*gDNA. 2. FDX5-F2/FDX5-R2-*fdx5*gDNA. 3. FDX5-R2/RB2-WTgDNA. 4. FDX5-F2/FDX5-R2-WTgDNA. 5. FDX5-F2/RIM1-*fdx5*gDNA. 6. FDX5-F2/RIM1-WTgDNA. The fragments

amplified from the gDNA were sequenced to localize the exact insertion site. (F) Alignment of full-length FDX5 and the truncated FDX5 synthesized in the mutant. Note that the sequences diverge at amino acid 27 and the mutant protein is terminated at amino acid 35. The asterisks in red highlight the 4 cysteine residues involved in 2Fe-2S binding. Red represents identical amino acids between mutant and WT while the blue and black represent amino acids predicted as a consequence of the insertion. (G) Left panel: Western blot showing the absence of the FDX5 protein in the *fdx5* mutant [but restored in the *fdx5*(FDX5) rescued strain]. Upper panel shows abundance of FDX5, the middle panel shows the abundance of FDX1 (Fd) protein, and the lower panel shows abundance of tubulin, which was used as a loading control. Right panel: Western blot showing accumulation of FDX5 in additional *fdx5*(FDX5) rescued strains. 1, 2 and 3 represent the *fdx5*(FDX5) rescued strains from *FDX5* coding sequence (CDS), while 31, 32, 33 represent the *fdx5*(FDX5) rescued strains from *FDX5* genomic DNA. Tubulin accumulation is shown as loading controls.

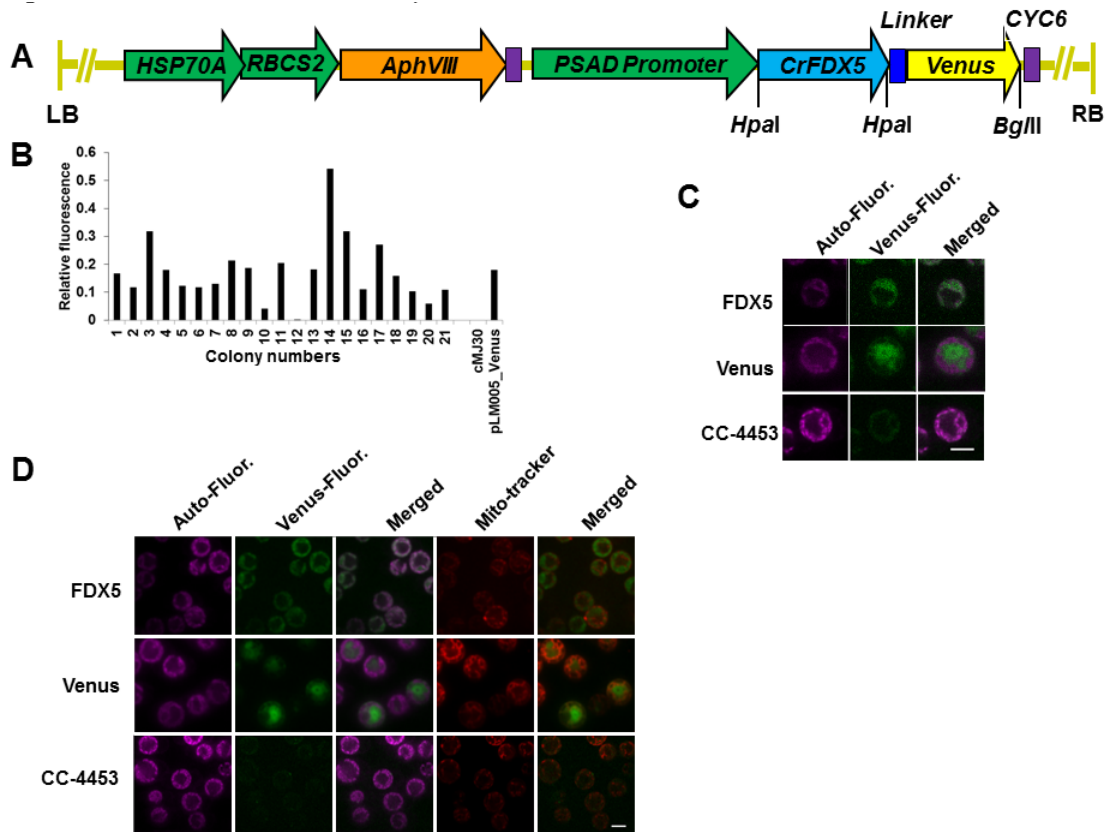

**Fig. S3.** FDX5 is localized to chloroplasts. (A) Schematic representation of pLM005\_Venus construct containing the fusion between the *FDX5* and Venus genes. Dark green arrows represent promoters, which include the dual *HSP70* and *RBCS2* promoter driving the *AphVIII* gene (orange) and the *PSAD* (constitutive, green) promoter driving the gene encoding the FDX5-Venus fusion proteins. The *CrFDX5* gene is in blue and *Venus* in yellow. LB and RB stand for left and right border, respectively. Venus is fused to FDX5 through the linker (35) (dark blue) and the terminator is from *CYC6* (purple). (B) Fluorescence was measured from the Venus-tagged *Chlamydomonas* transformants using a TECAN plate reader before confocal imaging of the sample was performed. Untransformed cMJ030 (CC-4533) and cMJ030 transformed with pLM005\_Venus vectors (without the fusion) were used as negative and positive controls, respectively. The y-axis gives the relative fluorescence compared to the positive control (pLM005\_Venus), and the x-axis represents various strains, with the rescued strains given as numbers 1-21. Fluorescence was measured 3 separate times; all replicates showed similar results. (C) Localization of FDX5 protein in a single *Chlamydomonas* cell. The cells either contained the introduced vector with neither the *Venus* nor *FDX5* sequence (CC-4533), the vector expressing *Venus* (Venus), or the vector expressing *FDX5* fused to *Venus* (FDX5-Venus). Column 1 shows Venus fluorescence (green), column 2 shows Chl autofluorescence (magenta) and column 3 shows the merged image of column 1 and column 2. The scale bar represents 5  $\mu\text{m}$ . (D) Intracellular localization of FDX5 in *Chlamydomonas*. Column 1 shows Chl auto-fluorescence (magenta), column 2 shows Venus fluorescence (green), column 3 shows the merged image of column 1 and column 2, column 4 shows fluorescence of the Mito-tracker (red), and column 5 shows the merged image of column 4 and column 2. The scale bar (bottom right) represents 5  $\mu\text{m}$ .

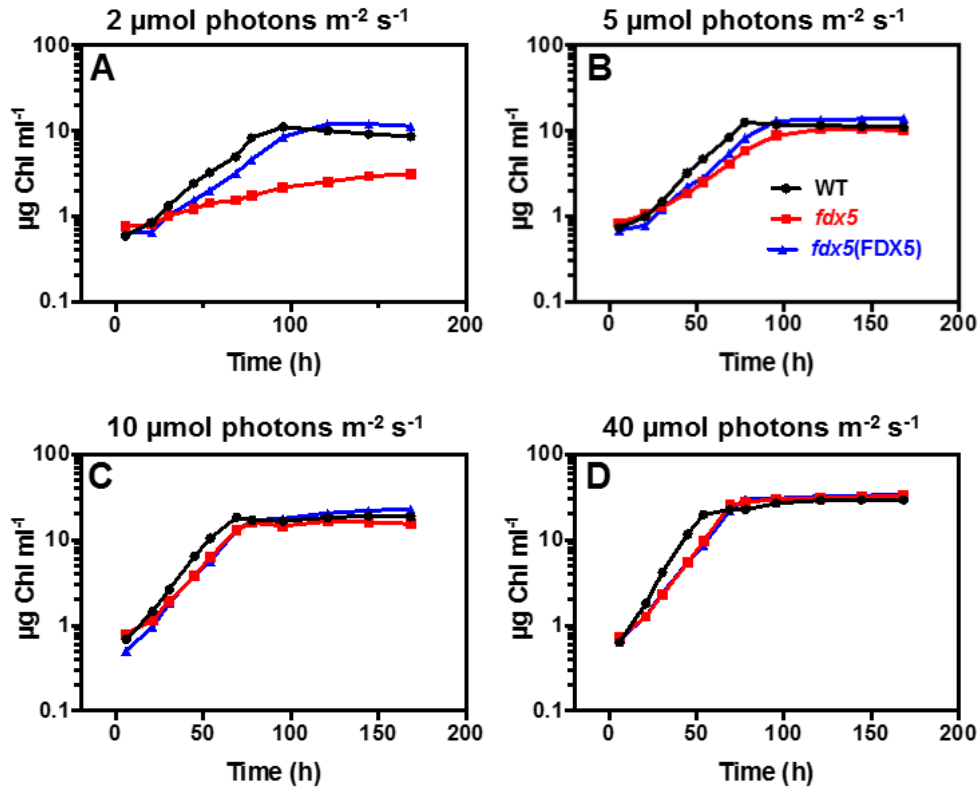

**Fig. S4.** *fdx5* growth at different light intensities. Growth of WT, *fdx5* and a complemented strain [*fdx5*(FDX5)] in liquid TAP medium for 7 d at 2 µmol photons m<sup>-2</sup> s<sup>-1</sup> (A), 5 µmol photons m<sup>-2</sup> s<sup>-1</sup> (B), 10 µmol photons m<sup>-2</sup> s<sup>-1</sup> (C) and 40 µmol photons m<sup>-2</sup> s<sup>-1</sup> (D). Growth was determined by measurements of Chl concentration (µg ml<sup>-1</sup>), as indicated on the y-axes.



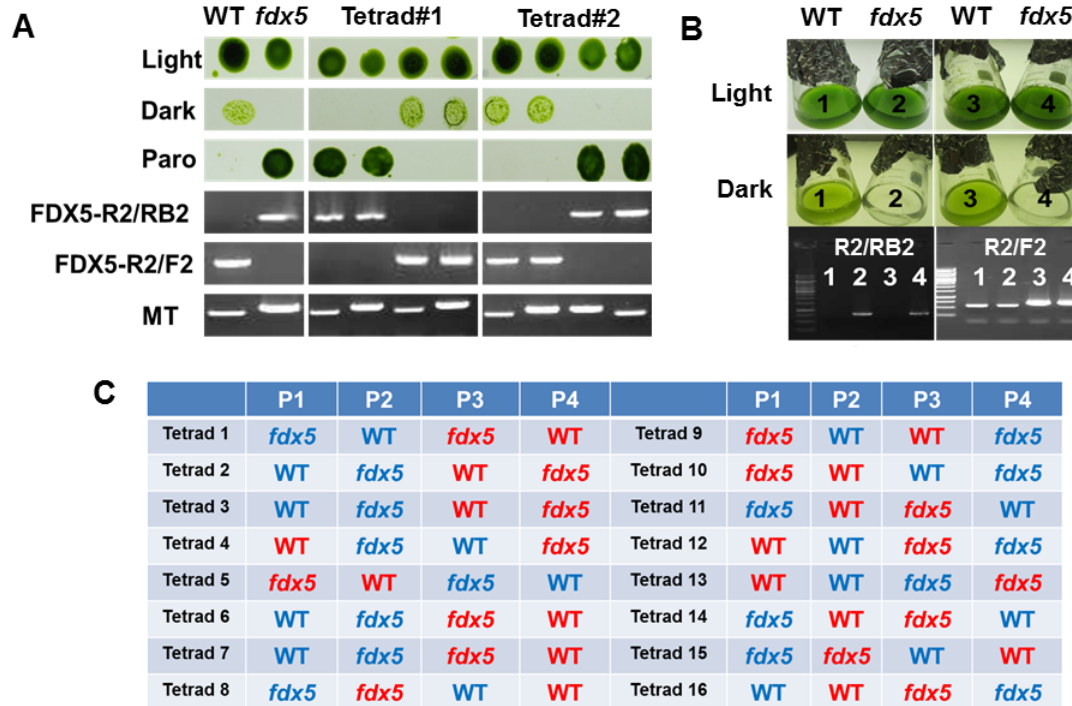

**Fig. S5.** The *fdx5* dark growth deficiency is linked to paromomycin resistance. (A) Tetrad analyses: Progeny from tetrads #8 and #16 were spotted onto TAP agar (and supplemented with paromomycin), grown in the light and dark, and also inoculated into TAP liquid medium with 10  $\mu$ g/ml paromomycin (Paro) and grown in the light. Liquid cultures were used for PCR to determine segregation of the *fdx5* mutation (2:2) using the FDX5-R2/RB2 primer pair (a band is amplified in the mutant but not WT progeny) or the FDX5-R2/F2 primer pair (a band is amplified in WT but not mutant progeny). PCR for mating type (MT) also exhibited 2:2 segregation. WT and the *fdx5* mutant (two leftmost columns) were used as controls. (B) Growth phenotype of progeny from tetrad #2; each of the progeny were grown in liquid TAP medium. 1-4 are the four daughter cells from tetrad #2, which were grown in the light or dark. PCR was performed to confirm the genotype of the progeny; the DNA from progeny 2 and 4 (the progeny unable to grow in the dark) was amplified with the FDX5-R2/RB2 primers, which only amplifies mutant DNA. (C) Summary of the tetrad analyses. The tetrads from 16 zygotes were analyzed by PCR. The blue and red lettering of WT and *fdx5* represent mating type + and -, respectively. P1-P4 are the four progeny of a selected tetrad.

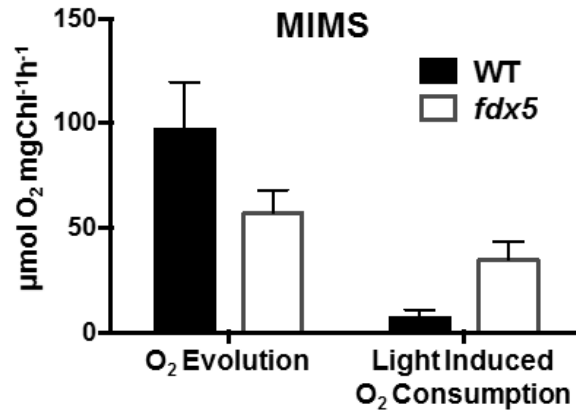

**Fig. S6.** Elevated light-induced O<sub>2</sub> consumption occurs in *fdx5* maintained in the dark. Membrane inlet mass spectrometry (MIMS analysis) was used to quantify light-induced O<sub>2</sub> evolution and consumption in the *fdx5* mutant and WT after 24 h in the dark. The cells used for the experiments were in mid-logarithmic phase. Error bars represent standard deviation (n=3), and the experiments were performed in triplicate.

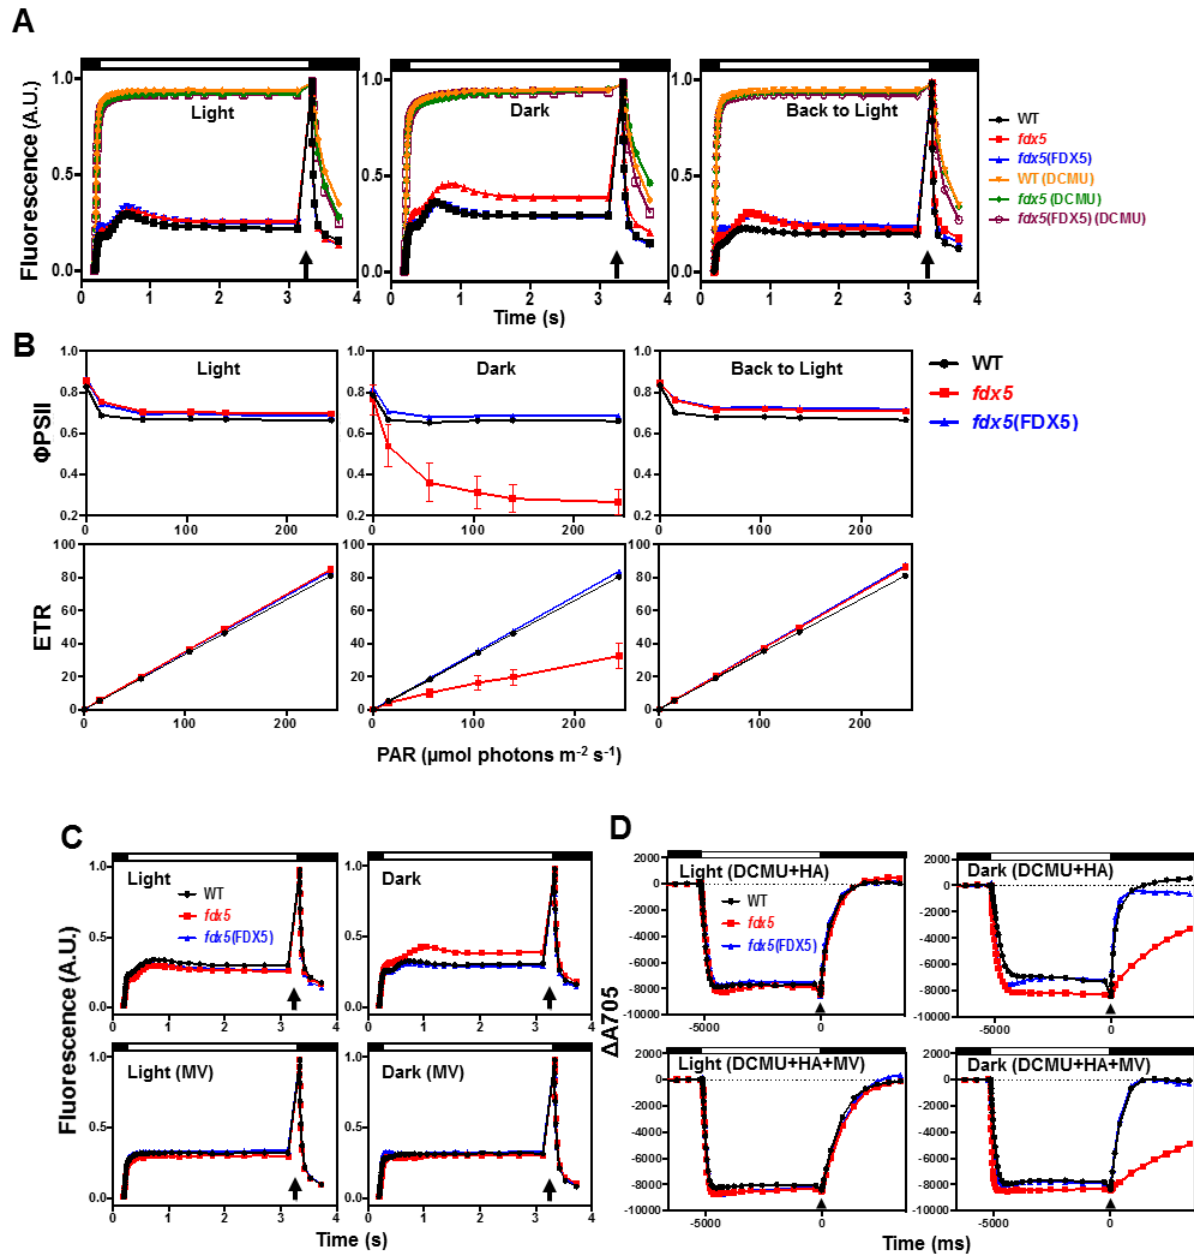

**Fig. S7.** Fluorescence and spectroscopic analyses show impairment of photosynthetic electron transport. (A) Chl fluorescence induction kinetics for cells [*fdx5* mutant, WT and the *fdx5*(FDX5) complemented strain] maintained in light or dark for 24 h, as indicated. All cells were dark-adapted for 20 min prior to the measurements. Fluorescence was measured either in the presence or absence of 3-(3,4-dichlorophenyl)-1-1-dimethylurea (10 μM) (DCMU), as indicated. The left curves show fluorescence induction for the various strains after growth in the light (**Light**); the middle curves show fluorescence induction for the various strains after maintenance in the dark for 24 h (**Dark**); the right curves show fluorescence induction after returning the dark-maintained strains to the light for 24 h (**Back to Light**). The light intensity used for the fluorescence induction curves was 156 μmol photons m<sup>-2</sup> s<sup>-1</sup>. (B) Measurement of quantum efficiency of PSII (ΦPSII) and electron transport rates (ETR) for WT, *fdx5* and the *fdx5*(FDX5) complemented strain after growth in the light (**Light**, left), maintenance in the dark for 24 h (**Dark**, middle), and maintenance in the dark for 24 h and then the dark-maintained cells transferred

back to the light for 24 h (**Back to Light**, right). Cultures were grown in TAP medium and concentrated in the same medium to 10  $\mu\text{g/mL}$  Chl. All measurements were made using a DUAL-PAM 100 fluorometer. Photosynthetically Active Radiation (PAR) is given as  $\mu\text{mol photons m}^{-2} \text{ s}^{-1}$ . Error bars represent standard deviation. (C) Relative Chl fluorescence measurements (using JTS-10 spectrophotometer) for WT, *fdx5* and *fdx5*(FDX5) cells grown in the light or maintained in the dark in the presence or absence of 1 mM methyl viologen (MV) as an electron acceptor, as indicated. Actinic light was on for 3 s at an intensity of 156  $\mu\text{mol photons m}^{-2} \text{ s}^{-1}$ . Resuspended cells were dark-adapted for 20 min prior to the measurements. (D) P700 oxidation-reduction kinetics on WT, *fdx5* and *fdx5*(FDX5) cells grown in the light or maintained in the dark (using JTS-10 spectrophotometer) in the presence and absence of MV. To assess the pool of electron donors to PSI, cells were resuspended in HEPES-KOH (pH 7.5, 10% Ficoll) to 30  $\mu\text{g/ml}$  Chl and incubated with 3-(3,4-dichloroprenyl)-1-1-dimethylurea (10  $\mu\text{M}$  DCMU) and hydroxylamine (1 mM HA) to completely block PSII activity. Actinic light was 165  $\mu\text{mol photons m}^{-2} \text{ s}^{-1}$  for 5 s followed by a flash of saturating light, and then complete darkness. Changes in the redox state of P700 were measured based on optical changes at 705 nm. In panels (C) and (D), bottom, 1 mM MV was added to the reaction as an electron acceptor for PSI and to inhibit FDX-dependent and NADPH-dependent CEF. Upward arrows present in (A), (C) and (D) represent saturating pulses of light.

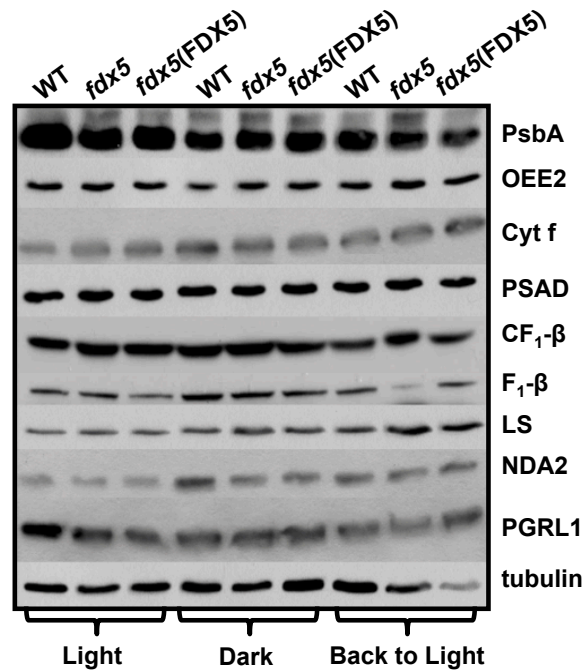

**Fig. S8.** Immunoblots of representative photosynthetic proteins in different strains. Proteins were resolved by SDS-PAGE (12% polyacrylamide) from 2.5  $\mu$ g Chl (whole cell) applied per lane. Tubulin was used as a loading control. Samples were collected at 0, 24 h in the dark, and back to light for 24 h (after a 24 h dark period). The proteins examined were PsbA (reaction center protein of PSII), OEE2 (oxygen evolving enhancer complex of PSII), Cyt f (PetA) (subunit of Cyt *b<sub>6</sub>f* complex), PSAD (subunit of PSI), CF<sub>1</sub>- $\beta$  (catalytic subunit of chloroplast ATP synthase), F<sub>1</sub>- $\beta$  (catalytic subunit of mitochondrial ATP synthase), LS (large subunit of RuBisCo), NDA2 (NADPH dehydrogenase protein involved in chlororespiration and NADPH-dependent CEF), PGRL1 (FDX-plastoquinone reductase, which is involved in ferredoxin-dependent CEF), tubulin. The strains used were WT, *fdx5* and *fdx5*(FDX5) rescued strain.

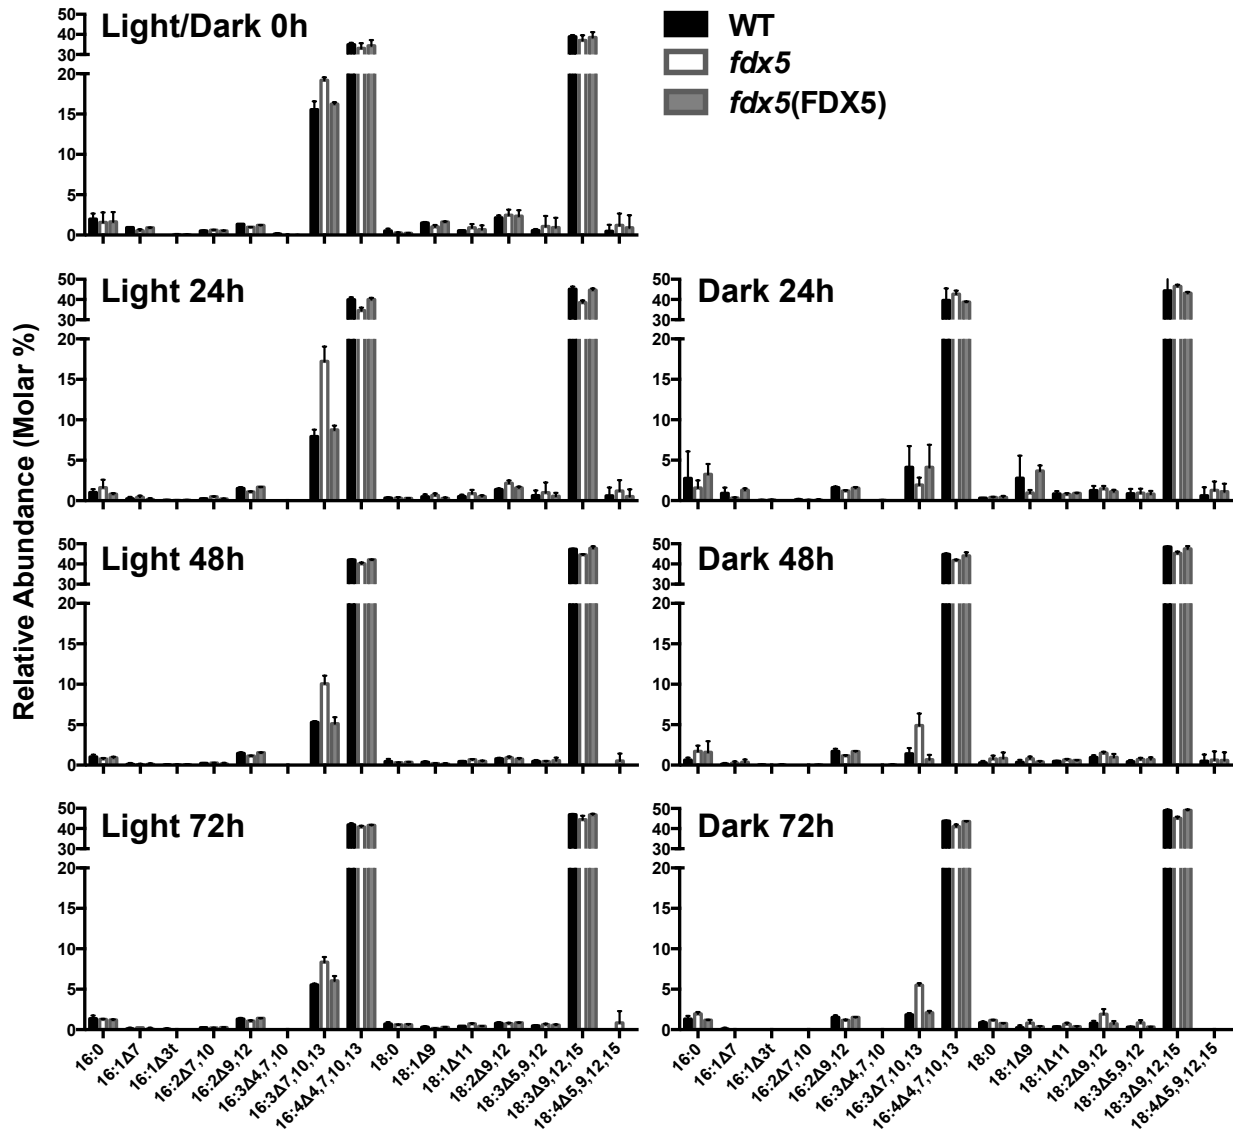

**Fig. S9.** Profiles of fatty acids in MGDG after growth in the light and dark. Levels of MGDG-associated fatty acids after growth of the cells in the light or dark for 48 and 72 h. Fatty acids are C16 and C18 with the predominant C16 species having 4 double bonds (C16:4<sup>Δ4,7,10,13</sup>), while the predominant C18 species has 3 double bonds (C18:3<sup>Δ9,12,15</sup>). Error bars, which are barely visible, represent standard deviations. The strains used were WT, *fdx5* and *fdx5*(FDX5) rescued strain.

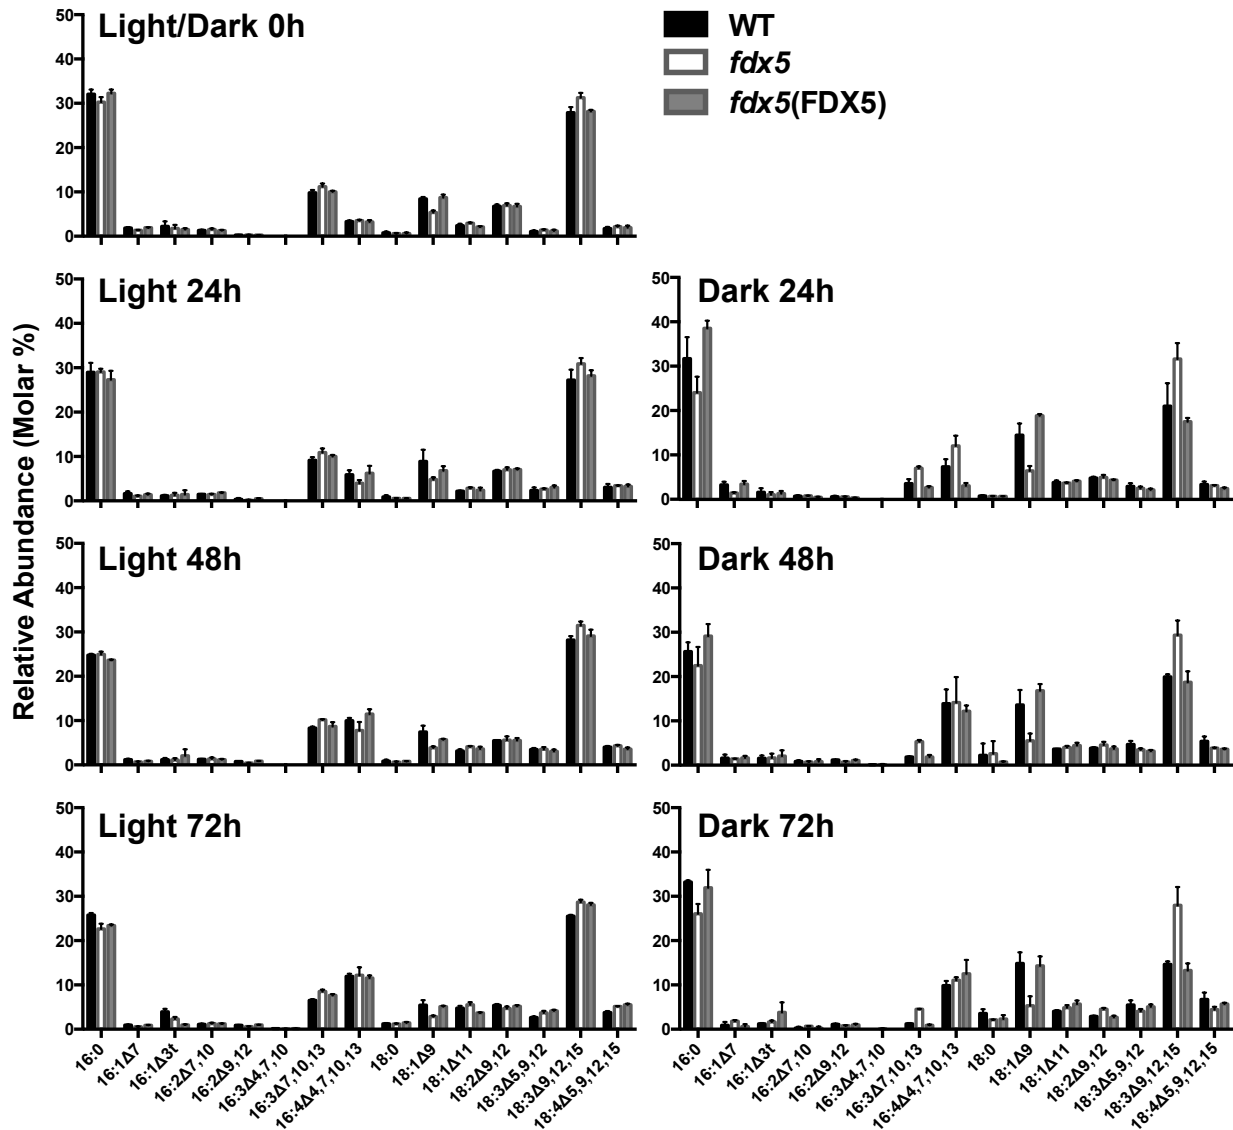

**Fig. S10.** Profiles of fatty acids in DGDG after growth in the light and dark. Levels of DGDG-associated fatty acids after growth of the cells in the light or dark for 48 and 72 h. Fatty acids are C16 and C18 with the predominant C16 species having 0 (C16:0) and 4 (C16:4<sup>Δ4,7,10,13</sup>) double bonds, while the predominant C18 species have 1 (C18:1<sup>Δ9</sup> and C18:1<sup>Δ11</sup>), 2 (C18:2<sup>Δ9,12</sup>) and 3 (C18:3<sup>Δ5,9,12</sup>, and C18:3<sup>Δ9,12,15</sup>) double bonds. Error bars represent standard deviation. The strains used were WT, *fdx5* and *fdx5*(FDX5) rescued strain.

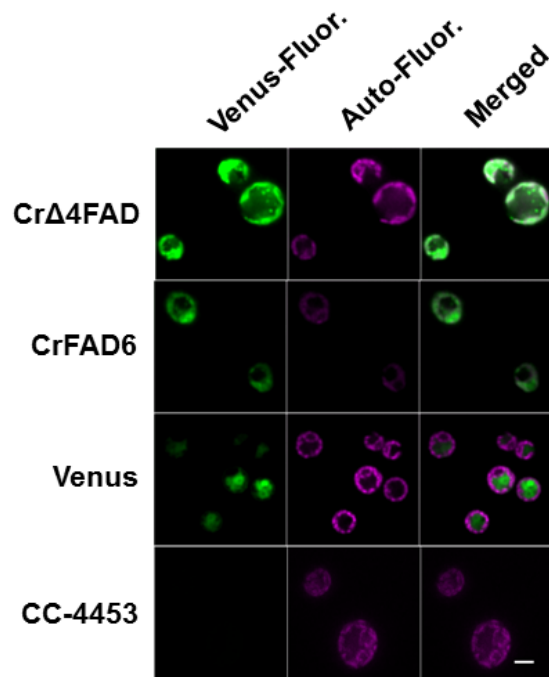

**Fig. S11.** CrΔ4FAD and CrFAD6 are localized to chloroplasts in *Chlamydomonas*. The cells either contained the introduced vector with neither *Venus* nor the *FDX5* sequence (CC-4533), with *Venus* (*Venus*) or with *CrΔ4FAD* or *CrFAD6* fused to *Venus* (indicated as CrΔ4FAD and CrFAD6). Column 1 shows *Venus* fluorescence (Venus-Fluor; green fluorescence), column 2 shows Chl auto-fluorescence (Auto-Fluor; magenta fluorescence), column 3 shows the merged image of column 1 and column 2 (green-blue indicates co-localization). The scale bar represents 5 μm.



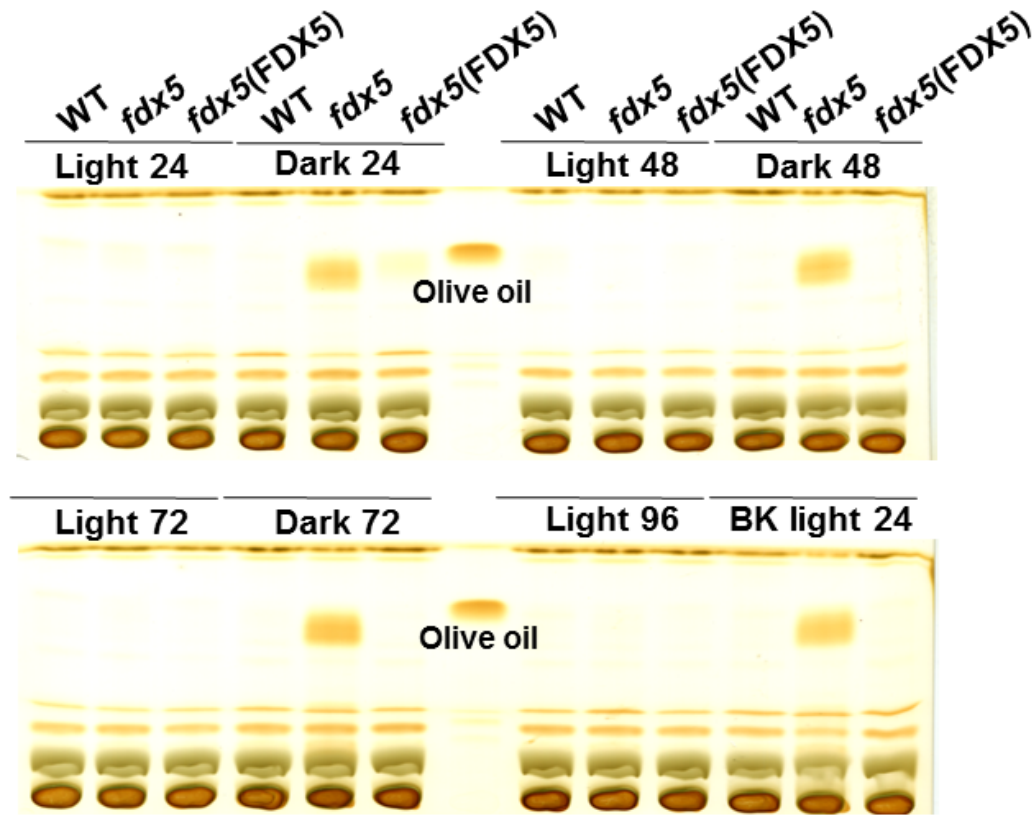

**Fig. S12.** TAG accumulates in *fdx5* in the dark. Total TAG was separated by thin layer chromatography at 24, 48, 72 h after growth of the cells in the light and dark, and from the dark (72 h) back to light for 24 h (BK light 24). Analyses were performed for WT, the *fdx5* mutant and the *fdx5*(FDX5) complemented strain. 20  $\mu$ g olive oil was used as the standard.

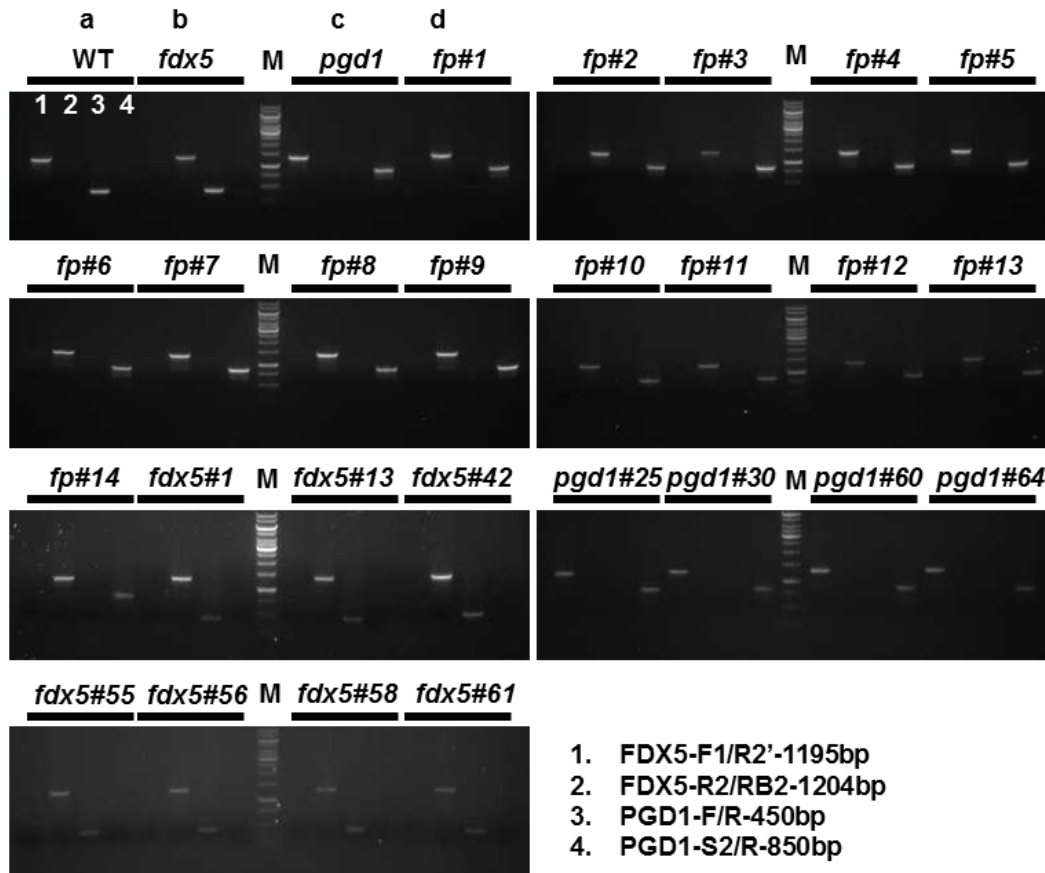

**Fig. S13.** Genotyping of the *fdx5pgd1* double mutants. *fp* represents the *fdx5pgd1* double mutants. *fdx5* and *pgd1* were used as the parental strains, *fdx5#1*, *fdx5#13*, *fdx5#42*, *fdx5#55*, *fdx5#56*, *fdx5#58*, *fdx5#61* are *fdx5* mutants that segregated in the cross, while the *pgd1#25*, *pgd1#30*, *pgd1#60*, *pgd1#64* were *pgd1* mutants that segregated in the cross. The primers and sizes of the amplification products are listed at the bottom. M represents DNA ladder. The primer pairs (1) FDX5-F1/R2 (for *FDX5*), (2) FDX5-R2/RB2 (for insertion into *FDX5*), (3) PGD1-F/R (for *PGD1*), and (4) PGD1-S2/R (for insertion into *PGD1*) were used to genotype the progeny (determine whether or not the strains had an insertion in *FDX5*, *PGD1* or both genes): progeny *a* has intact *FDX5* and *PGD1* genes (WT); progeny *b* has a disrupted *FDX5* and intact *PGD1* gene (*fdx5*); progeny *c* has an intact *FDX5* gene and a disrupted *PGD1* gene (*pgd1*); progeny *d* has a disrupted *FDX5* gene and a disrupted *PGD1* gene (*fdx5pgd1#1*). M represents DNA ladder.

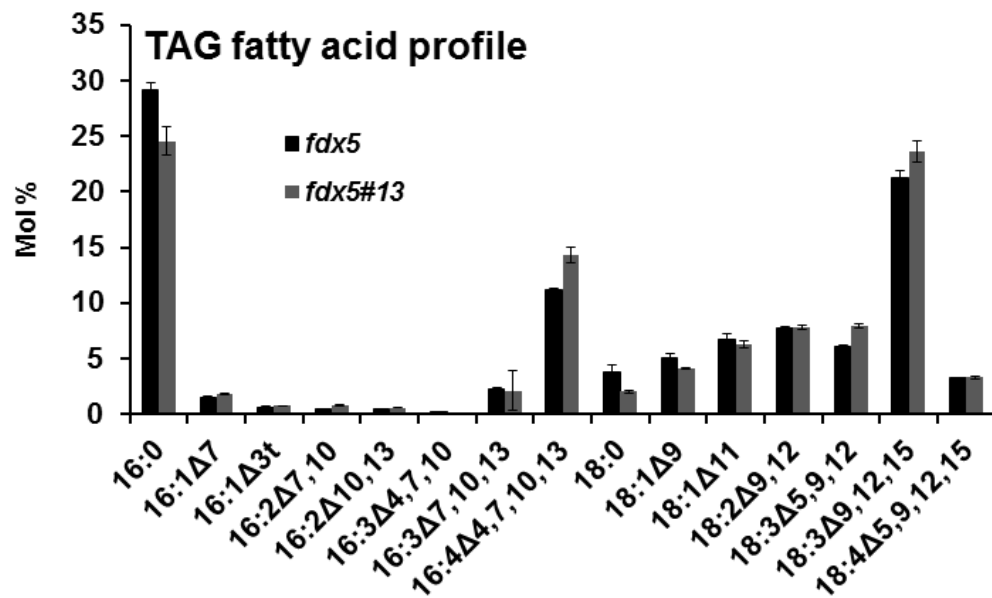

**Fig. S14.** Fatty acid profiles of *fdx5* and *fdx5#13* strains that were in the dark for 48 h. Error bars represent standard deviation (n=3). The molar percentage of the various fatty acids is given on the y-axis.

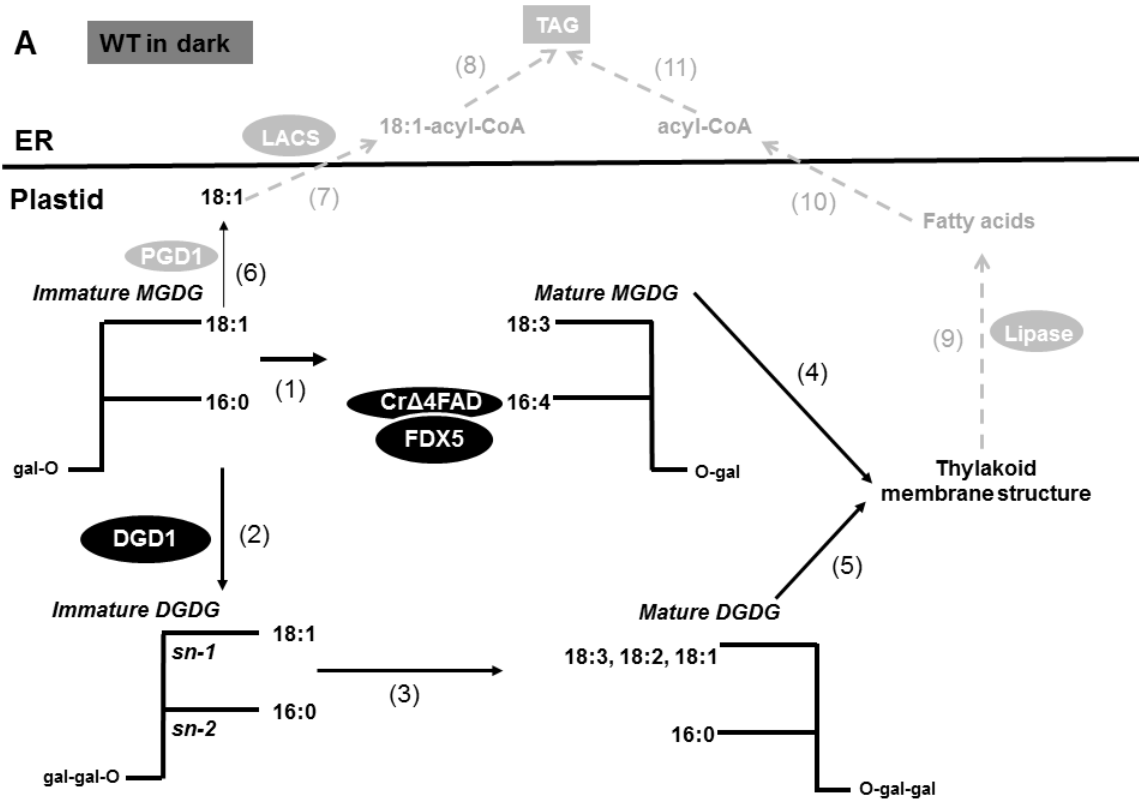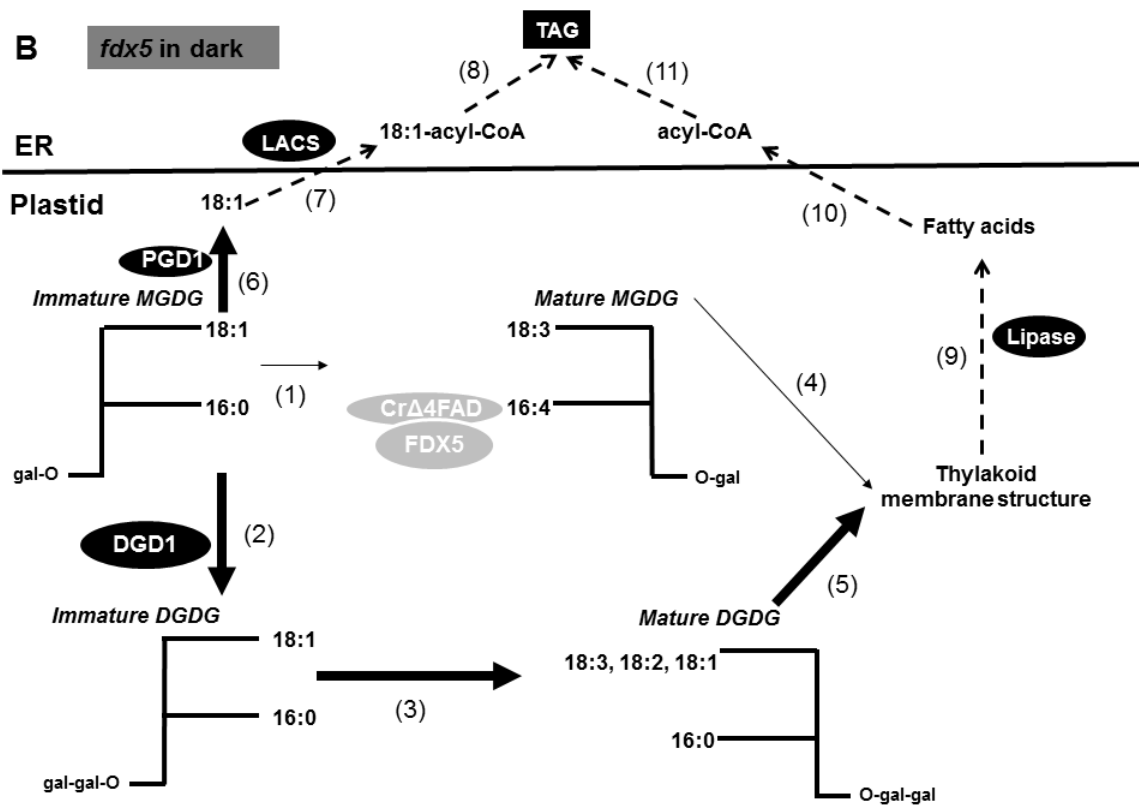

**Fig. S15.** Model for FDX5-mediated regulation of thylakoid membrane structure in the dark. The filled shapes and arrows represent proteins/enzymes and reactions, respectively. The black and grey colors represent the active and inactive status of the enzymes or reactions, respectively; and the thickness of the arrows represents the extent of the biosynthetic reactions. (A) Model for WT cells. (B) Model for the *fdx5* mutant. In the dark, the immature MGDG can be converted to a number of different products: (1) conversion of immature to mature MGDG by desaturation of C18:1 at *sn-1* and C16:0 at *sn-2* to C18:3 and C16:4 through CrFAD6 and CrΔ4FAD, respectively, with electron donation potentially from FDX5; (2) conversion from immature MGDG to immature DGDG through addition of a second galactose head group to the MGDG, which is catalyzed by DGD1 (digalactosyldiacylglycerol synthase); (3) conversion of immature DGDG to mature DGDG by desaturation of the C18:1 at *sn-1* position to C18:3 through the activity of CrFAD6 and electron donation potentially from FDX5; (4 and 5) integration of mature MGDG and DGDG into thylakoid membranes; (6) conversion of immature MGDG to lyso-immature MGDG by PGD1-dependent cleaving of C18:1 from the *sn-1* position; (7) conversion of cleaved C18:1 from plastid MGDG to C18:1-acyl-CoA by LACS (long chain acyl-CoA synthetase) in the ER; (8) recruitment of C18:1-acyl-CoA for TAG synthesis; (9) degradation of thylakoid membrane by lipases to release free fatty acids in plastid; (10) movement of free fatty acids from plastid to ER to generate acyl-CoA; (11) recruitment of the free acyl-CoA for TAG synthesis in the ER. The inability to perform (1) would promote (2) and (6). Fatty acids in addition to C18 can also be recruited for TAG formation.

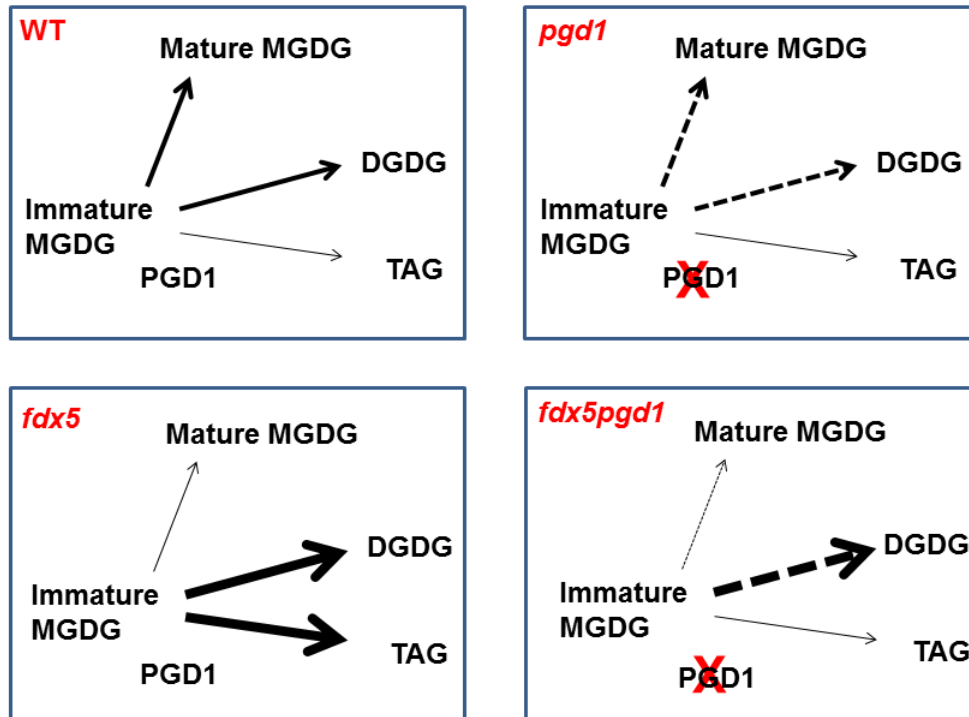

**Fig. S16.** The impact of PGD1 on lipid production in the various strains in the dark. The arrows are of different thicknesses, indicating a relative level of immature MGDG that is converted to various products. The dashed lines represent possible metabolic fates in the *pgd1* mutant.

## Tables S1-S5

**Table S1. Genes encoding ferredoxins in the Chlamydomonas genome.**

PredAlgo software (<https://giavap-genomes.ibpc.fr/cgi-bin/predalgotdb.perl?page=main>)<sup>26</sup> was used to predict the subcellular localization of Ferredoxins. Names, protein IDs, NCBI accession numbers, and predicted localizations are indicated.

| <b>Gene</b> | <b>JGI v4.0</b> | <b>Phytozome v10.0.4</b> | <b>NCBI</b>    | <b>Localization</b> |
|-------------|-----------------|--------------------------|----------------|---------------------|
| FDX1(Fd)    | 147787          | g15094                   | XP_001692808.1 | Chloroplast         |
| FDX2        | 159161          | Cre16.g658400            | XP_001697912.1 | Chloroplast         |
| FDX3        | 196707          | Cre06.g306350            | XP_001691381.1 | Chloroplast         |
| FDX4        | 196705          | Cre07.g334800            | XP_001700106.1 | Chloroplast         |
| FDX5        | 156833          | Cre17.g700950            | XP_001691603.1 | Chloroplast         |
| FDX6        | 196703          | Cre03.g183850            | XP_001702961.1 | Chloroplast         |
| FDX7        | 160049          | Cre01.g006100            | XP_001702098.1 | Chloroplast         |
| FDX8        | 179658          | Cre01.g005600            | XP_001702123.1 | Chloroplast         |
| FDX9        | 188740          | Cre12.g487900            | XP_001690910.1 | Chloroplast         |
| FDX10       | 189455          | Cre04.g225450            | XP_001692319.1 | Chloroplast         |
| FDX11       | 174881          | Cre06.g291650            | XP_001695531.1 | Chloroplast         |
| FDX12       | 205989          | Cre08.g374550            | -              | ?                   |
| MFDX        | 154720          | Cre12.g559950            | XP_001703155.1 | Mitochondria        |

**Table S2. Primers used in this study**

| Primer names     | Use of primers      | Orientation | Sequence                                                   | Tm     |
|------------------|---------------------|-------------|------------------------------------------------------------|--------|
| FDX5-F1          | Mutant screen       | forward     | 5'- GCATTGCCTAACAGCCTTACCTCCA -3'                          | 60.0°C |
| FDX5-R1          | Mutant screen       | reverse     | 5'- CCCAACAACCGTGTGTGCCACGCTTC -3'                         | 60.0°C |
| FDX5-F2          | Mutant screen       | forward     | 5'- GAAGCGTGGCACACACGGTTGTTGGG -3'                         | 60.0°C |
| FDX5-R2          | Mutant screen       | reverse     | 5'- TACTGGTGCTTGCCGTACTC -3'                               | 60.0°C |
| FDX5-F3          | Mutant screen       | forward     | 5'- GAGTACGGCAAGCACCAGTA -3'                               | 60.0°C |
| FDX5-R3          | Mutant screen       | reverse     | 5'- ATCAGTCCCATCCTCAACCAATCCTCA<br>CG -3'                  | 60.0°C |
| FDX5-COM-F       | Complementation     | forward     | 5'- GAATTCATTACACAGCAGTTTCAGGCAT<br>T -3'                  | 59.7°C |
| FDX5-COM-R       | Complementation     | reverse     | 5'- TAGGATCCCCATAGTTGGGGTTACATG<br>AA-3'                   | 58.8°C |
| RB1              | Insert localization | forward     | 5'- ATGGGGCGGTATCGGAGGAAAAG -3'                            | 60.0°C |
| RB2              | Insert localization | forward     | 5'- TACCGGCTGTTGGACGAGTCTTCTG -3'                          | 60.0°C |
| RIM1             | Insert localization | reverse     | 5'- GCTGGCACGAGTACGGGTTG -3'                               | 58.0°C |
| Mid-up           | Mating type         | forward     | 5'- ATGGCCTGTTTCTTAGC -3'                                  | 52.0°C |
| Mid-low          | Mating type         | reverse     | 5'- CTACATGTGTTTCTTAGC -3'                                 | 52.0°C |
| Fus-up           | Mating type         | forward     | 5'- ATGCTATCTTTCTCATTCT -3'                                | 52.0°C |
| Fus-low          | Mating type         | reverse     | 5'- GCAAAATACACGTCTGGAAG -3'                               | 52.0°C |
| FDX5Loc          | Localization        | forward     | 5'-GGTTAACATGCTGTGCGCGCTCCC-3'                             | 60.0°C |
| FDX5Loc          | Localization        | reverse     | 5'-GGTTAACCTGGTGCTTGCCGTACTCG-3'                           | 60.0°C |
| APH8-F1          | Southern blot probe | forward     | 5'-ATGGACGATGCGTTGCGT-3'                                   | 66.0°C |
| APH8-R1          | Southern blot probe | reverse     | 5'-CTCAGAAGAAGTCTGTCACA-3'                                 | 62.0°C |
| FDX5-F4          | Southern blot probe | forward     | 5'-TACTCCCTCCGACCCACATCCTGA-3'                             | 72.0°C |
| FDX5-R4          | Southern blot probe | reverse     | 5'-GACCCACCTTACCCACATCAG-3'                                | 70.0°C |
| PGD1-F           | Genotyping          | forward     | 5'- ACATCGTGAATGGCAAAACA -3'                               | 60.0°C |
| PGD1-R           | Genotyping          | reverse     | 5'- ATTGCGCGGTTTAGAACTT -3'                                | 60.0°C |
| PGD1-S2-1        | Genotyping          | forward     | 5'- ATAGGGGTTCCGCGCACAT -3'                                | 70.0°C |
| FDX5-Y2H-F       | Y2H                 | forward     | 5'- CACCATGCTGTGCGCGCTCCCAGC -3'                           | 60.0°C |
| FDX5-Y2H-R       | Y2H                 | reverse     | 5'- TTAGTGGTGCTTGCCGTACT -3'                               | 60.0°C |
| FD-Y2H-F         | Y2H                 | forward     | 5'- CACCATGGCCATGGCTATGCGCTC -3'                           | 60.0°C |
| FD-Y2H-R         | Y2H                 | reverse     | 5'- GTACAGGGCCTCCTCCTGGTG -3'                              | 60.0°C |
| CrΔ4FAD-Y2H-F    | Y2H                 | forward     | 5'- CACCATGAACGCCACGATGCAGCG -3'                           | 60.0°C |
| CrΔ4FAD-Y2H-R    | Y2H                 | reverse     | 5'- TTAGAAGTGGAGAGCATCAGCATCTCG<br>C -3'                   | 60.0°C |
| CrFAD6-Y2H-F     | Y2H                 | forward     | 5'- CACCATGGCGTTCGCTCTGCGCTC -3'                           | 60.0°C |
| CrFAD6-Y2H-R     | Y2H                 | reverse     | 5'- TTAGAAGGCGGCGGAGTCGG -3'                               | 60.0°C |
| FDX5_Venus -F    | Gibson Cloning      | forward     | 5'- GCTACTCACAACAAGCCCAGTTATGCTG<br>TGCGCGCTCCCAGC -3'     | 60.0°C |
| FDX5_Venus -R    | Gibson Cloning      | reverse     | 5'- GAGCCACCCAGATCTCCGTTCTGGTGCTT<br>GCCGTACT -3'          | 60.0°C |
| CrΔ4FAD_Venus -F | Gibson Cloning      | forward     | 5'-GCTACTCACAACAAGCCCAGTTATGAAC<br>GCCACGATGCAGCG -3'      | 60.0°C |
| CrΔ4FAD_Venus -R | Gibson Cloning      | reverse     | 5'- GAGCCACCCAGATCTCCGTTGAAGTTGG<br>AGAGCATCAGCATCTCGC -3' | 60.0°C |



|                 |                    |         |                                                        |        |
|-----------------|--------------------|---------|--------------------------------------------------------|--------|
| CrFAD6_Venus -F | Gibson Cloning     | forward | 5'- GCTACTCACAACAAGCCCAGTTATGGCG<br>TTCGCTCTGCGCTC -3' | 60.0°C |
| CrFAD6_Venus -R | Gibson Cloning     | reverse | 5'- GAGCCACCCAGATCTCCGTTGAAGGCGG<br>CGGAGTCGG -3'      | 60.0°C |
| oMJ237          | Gibson sequencing  | forward | 5'- GGAGGTACGACCGAGATGGCT-3'                           | 60.0°C |
| oMJ555          | Venus sequencing   | reverse | 5'-CACGTCGCCGTCCAGCTC -3'                              | 60.0°C |
| oMJ556          | mCherry sequencing | reverse | 5'- CTCCTTGATGATGGCCATG-3'                             | 60.0°C |

**Table S3. Strains used in this study**

| <b>Name</b>            | <b>Note</b>                              | <b>Background</b>                                  |
|------------------------|------------------------------------------|----------------------------------------------------|
| CC124/5                | Wild-type - mating type pair             | <i>nit1nit2</i>                                    |
| D66                    | Wild-type - CC-4425                      | <i>nit2, cw15, mt<sup>+</sup></i>                  |
| 21gr(+/-)              | Wild-type - mating type pair             | <i>NIT1, NIT2</i>                                  |
| cMJ030                 | Wild-type - from 4A x D66 cross, CC-4533 | <i>nit1nit2cw15</i>                                |
| <i>fdx5</i> in D66     | The mutant was generated in D66          | <i>nit1nit2cw15, Paro<sup>+</sup></i>              |
| <i>fdx5</i> in CC124/5 | Backcross of <i>fdx5</i> into CC124/5    | <i>nit1nit2, Paro<sup>+</sup></i>                  |
| <i>fdx5</i> in 21gr    | Backcross of <i>fdx5</i> into 21gr(+/-)  | <i>NIT1, NIT2, Paro<sup>+</sup></i>                |
| dw15                   | CC-4619                                  | <i>nit1nit2cw15</i>                                |
| <i>pgd1</i> in dw15    | CC-4593                                  | <i>nit1nit2cw15, Hyg<sup>+</sup></i>               |
| <i>fdx5</i> #          | Segregated from cross of <i>fdx5pgd1</i> | <i>nit1nit2, Paro<sup>+</sup></i>                  |
| <i>pgd1</i> #          | Segregated from cross of <i>fdx5pgd1</i> | <i>nit1nit2, Hyg<sup>+</sup></i>                   |
| <i>fdx5pgd1</i>        | Segregated from cross of <i>fdx5pgd1</i> | <i>nit1nit2, Paro<sup>+</sup>, Hyg<sup>+</sup></i> |
| <i>pLM005FDX5</i>      | Transformed to cMJ030, for localization  | <i>nit1nit2, Paro<sup>+</sup></i>                  |
| <i>pLM005Cr44FAD</i>   | Transformed to cMJ030, for localization  | <i>nit1nit2, Paro<sup>+</sup></i>                  |
| <i>pLM005CrFAD6</i>    | Transformed to cMJ030, for localization  | <i>nit1nit2, Paro<sup>+</sup></i>                  |
| <i>fdx5</i> (FDX5) -1  | By <i>FDX5</i> -cDNA                     | <i>nit1nit2, Paro<sup>+</sup>, Zeo<sup>+</sup></i> |
| <i>fdx5</i> (FDX5) -2  | By <i>FDX5</i> -gDNA                     | <i>nit1nit2, Paro<sup>+</sup>, Zeo<sup>+</sup></i> |

**Table S4. Constructs used in this study**

| Use                                                | Construct      | Plasmid name         | Insert or PCR product | Primers                               | Plasmid backbone | Cloning method |
|----------------------------------------------------|----------------|----------------------|-----------------------|---------------------------------------|------------------|----------------|
| <b>Localization</b>                                | Venus          | pLM005_Venus         | -                     | -                                     | pUC19            | -              |
|                                                    | Venus:FDX5     | pLM005FDX5_Venus     | FDX5 CDS              | FDX5_Venus -F/<br>FDX5_Venus -R       | pUC19            | Gibson Cloning |
|                                                    | Venus:CrΔ4FAD  | pLM005 CrΔ4FAD_Venus | CrΔ4FAD CDS           | CrΔ4FAD_Venus -F/<br>CrΔ4FAD_Venus -R | pUC19            | Gibson Cloning |
|                                                    | Venus:CrFAD6   | pLM005 CrFAD6_Venus  | CrFAD6 CDS            | CrFAD6_Venus -F/<br>CrFAD6_Venus -R   | pUC19            | Gibson Cloning |
| <b>Mating-based split ubiquitin system (mbSUS)</b> | D-TOPO:FD      | pENTR/D-TOPO_FD      | FD CDS                | FD-Y2H -F/<br>FD-Y2H -R               | pENTR            | D-TOPO Cloning |
|                                                    | D-TOPO:FDX5    | pENTR/D-TOPO_FDX5    | FDX5 CDS              | FDX5-Y2H -F/<br>FDX5-Y2H -R           | pENTR            | D-TOPO Cloning |
|                                                    | D-TOPO:CrΔ4FAD | pENTR/D-TOPO_CrΔ4FAD | CrΔ4FAD CDS           | CrΔ4FAD-Y2H-F/<br>CrΔ4FAD-Y2H-R       | pENTR            | D-TOPO Cloning |
|                                                    | D-TOPO:CrFAD6  | pENTR/D-TOPO_CrFAD6  | CrFAD6 CDS            | CrFAD6-Y2H-F/<br>CrFAD6-Y2H-R         | pENTR            | D-TOPO Cloning |
|                                                    | NubG           | pXN22                | -                     | -                                     | pUC              | -              |
|                                                    | FD:NubG        | pXN22_FDX1           | FD CDS                | FD-Y2H -F/<br>FD-Y2H -R               | pUC              | LR Cloning     |
|                                                    | FDX5:NubG      | pXN22_FDX5           | FDX5 CDS              | FDX5-Y2H -F/<br>FDX5-Y2H -R           | pUC              | LR Cloning     |
|                                                    | Cub            | pMet-YC              | -                     | -                                     | pUC              | -              |
|                                                    | Cub:CrΔ4FAD    | pMet-YC_CrΔ4FAD      | CrΔ4FAD CDS           | CrΔ4FAD-Y2H-F/<br>CrΔ4FAD-Y2H-R       | pUC              | LR Cloning     |
|                                                    | Cub:CrFAD6     | pMet-YC_CrΔ4FAD      | CrFAD6 CDS            | CrFAD6-Y2H-F/<br>CrFAD6-Y2H-R         | pUC              | LR Cloning     |
| <b>Complementation</b>                             | PSAD:FDX5 cDNA | pJM43Ble_FDX cDNA    | FDX5 cDNA             | FDX5-COM-F1/<br>FDX5-COM-R1           | pSP124           | EcoRI/BamHI    |
|                                                    | PSAD:FDX5 gDNA | pJM43Ble_FDX gDNA    | FDX5 gDNA             | FDX5-COM-F1/<br>FDX5-COM-R1           | pSP124           | EcoRI/BamHI    |

**Table S5. Pull down assay using FDX5 to establish interacting proteins**

| Name                                   | ID Number     | Annotation                                 | Accession ID | MW <sup>1</sup> | Hits <sup>2</sup> |
|----------------------------------------|---------------|--------------------------------------------|--------------|-----------------|-------------------|
| FDX5                                   | Cre17.g700950 | apoferrredoxin                             | gi 159466834 | 14 kDa          | 8                 |
| <b>chlorophyll a/b binding protein</b> |               |                                            |              |                 |                   |
| LHCBM6                                 | Cre06.g285250 | chlorophyll a/b binding protein of LHCII   | gi 159474480 | 27 kDa          | 7                 |
| LHCA5                                  | Cre10.g425900 | chlorophyll a/b binding protein of LHCI    | gi 159489490 | 28 kDa          | 6                 |
| LHCBM1                                 | Cre01.g066917 | chlorophyll a/b binding protein of LHCII   | gi 20269804  | 28 kDa          | 4                 |
| LHCB5                                  | Cre16.g673650 | chlorophyll a/b binding protein of LHCII   | gi 159475641 | 31 kDa          | 4                 |
| LHCBM2                                 | Cre12.g548400 | chlorophyll l a/b binding protein of LHCII | gi 159471686 | 27 kDa          | 4                 |
| LHCB4                                  | Cre17.g270250 | chlorophyll a/b binding protein of LHCII   | gi 159478202 | 30 kDa          | 4                 |
| LHCA7                                  | Cre16.g687900 | chlorophyll a/b binding protein of LHCI    | gi 40714521  | 26 kDa          | 4                 |
| LHCA4                                  | Cre10.g452050 | chlorophyll a/b binding protein of LHCI    | gi 40714509  | 29 kDa          | 4                 |
| LHCA3                                  | Cre11.g467573 | chlorophyll a/b binding protein of LHCI    | gi 40714511  | 29 kDa          | 4                 |
| LHCA9                                  | Cre07.g344950 | chlorophyll a/b binding protein of LHCI    | gi 159468772 | 23 kDa          | 3                 |
| LHCA8                                  | Cre06.g272650 | chlorophyll a/b binding protein of LHCI    | gi 159476206 | 26 kDa          | 3                 |
| LHCBM5                                 | Cre03.g156900 | chlorophyll a/b binding protein of LHCII   | gi 159478875 | 29 kDa          | 3                 |
| LHCA6                                  | Cre06.g278213 | chlorophyll a/b binding protein of LHCI    | gi 159479992 | 28 kDa          | 3                 |
| LHCA2                                  | Cre12.g508750 | chlorophyll a/b binding protein of LHCI    | gi 159465641 | 27 kDa          | 3                 |
| LHCBM3                                 | Cre04.g232104 | chlorophyll a/b binding protein of LHCII   | gi 159491492 | 27 kDa          | 2                 |
| <b>Ribosomal protein</b>               |               |                                            |              |                 |                   |
| PRL4                                   | Cre09.g397697 | ribosomal protein L4                       | gi 159473354 | 45 kDa          | 8                 |
| PRL6                                   | Cre01.g011000 | ribosomal protein L6                       | gi 159463286 | 24 kDa          | 7                 |
| PRPL7                                  | Cre13.g581650 | plastid ribosomal protein L7/L12           | gi 159470865 | 14 kDa          | 6                 |
| RPS7                                   | Cre12.g498900 | ribosomal protein S7                       | gi 159488703 | 22 kDa          | 6                 |
| RPL13                                  | Cre14.g630100 | ribosomal protein L13                      | gi 159469029 | 24 kDa          | 5                 |
| RPS3                                   | Cre11.g467702 | ribosomal protein S3                       | gi 213517427 | 82 kDa          | 5                 |
| RPL18A                                 | Cre01.g047750 | ribosomal protein L18a                     | gi 159463026 | 21 kDa          | 5                 |
| RPS3                                   | Cre02.g102250 | ribosomal protein S3                       | gi 159483497 | 26 kDa          | 4                 |
| PRPL4                                  | Cre11.g479500 | plastid ribosomal protein L4               | gi 159478579 | 26 kDa          | 4                 |
| RPP0                                   | Cre12.g520500 | acidic ribosomal protein P0                | gi 159477927 | 35 kDa          | 4                 |
| RPL7A                                  | Cre12.g529651 | ribosomal protein L7a                      | gi 159477735 | 29 kDa          | 4                 |
| PRPL1                                  | Cre02.g088900 | plastid ribosomal protein L1               | gi 159487501 | 32 kDa          | 4                 |
| RPL21                                  | Cre06.g278135 | ribosomal protein L21                      | gi 159479900 | 18 kDa          | 4                 |
| PRPL31                                 | Cre48.g761197 | plastid ribosomal protein L3               | gi 159485314 | 28 kDa          | 4                 |
| RPS13                                  | Cre07.g331900 | ribosomal protein S13                      | gi 159464389 | 17 kDa          | 4                 |
| PSRP3                                  | Cre02.g083950 | plastid-specific ribosomal protein 3       | gi 159487801 | 33 kDa          | 4                 |
| PRPL9                                  | Cre12.g556050 | plastid ribosomal protein L9               | gi 159472060 | 22 kDa          | 3                 |
| RPL19                                  | Cre02.g075700 | ribosomal protein L19                      | gi 159487227 | 23 kDa          | 3                 |
| RPS3a                                  | Cre13.g568650 | ribosomal protein S3a                      | gi 159471131 | 29 kDa          | 3                 |
| RPL10                                  | Cre09.g388200 | ribosomal protein L10                      | gi 159472591 | 26 kDa          | 3                 |
| RPL14                                  | Cre17.g701200 | ribosomal protein L14                      | gi 159466828 | 15 kDa          | 3                 |
| RPL11                                  | Cre01.g027000 | ribosomal protein L11                      | gi 159463566 | 20 kDa          | 3                 |

|                                       |               |                                                    |              |        |    |
|---------------------------------------|---------------|----------------------------------------------------|--------------|--------|----|
| RPL12                                 | Cre12.g528750 | ribosomal protein L12                              | gi 159477751 | 18 kDa | 3  |
| RPS5                                  | Cre06.g290950 | ribosomal protein S5                               | gi 159474574 | 22 kDa | 3  |
| RPL11                                 | Cre01.g027000 | ribosomal protein L5                               | gi 126165895 | 20 kDa | 3  |
| RPS14                                 | Cre11.g480150 | ribosomal protein S14                              | gi 159478595 | 16 kDa | 3  |
| PRPS5                                 | Cre16.g659950 | plastid ribosomal protein S5                       | gi 159479560 | 72 kDa | 3  |
| RPS24                                 | Cre10.g456200 | ribosomal protein S24                              | gi 159480596 | 15 kDa | 3  |
| RPS16                                 | Cre13.g573351 | ribosomal protein S16                              | gi 159470701 | 16 kDa | 3  |
| RPS4                                  | Cre06.g308250 | ribosomal protein S4                               | gi 159466042 | 29 kDa | 3  |
| RPS6                                  | Cre09.g400650 | ribosomal protein S6                               | gi 159473970 | 28 kDa | 2  |
| RPS28                                 | Cre12.g510450 | ribosomal protein S28                              | gi 159465687 | 7 kDa  | 2  |
| RPS8                                  | Cre06.g272800 | ribosomal protein S8                               | gi 159476204 | 24 kDa | 2  |
| RPL13A                                | Cre12.g532550 | ribosomal protein L13a                             | gi 159469516 | 21 kDa | 2  |
| PRPL6                                 | Cre09.g415950 | plastid ribosomal protein L6                       | gi 159477461 | 22 kDa | 2  |
| PRPL31                                | Cre08.g365400 | plastid ribosomal protein L31                      | gi 159476036 | 15 kDa | 2  |
| RPL9                                  | Cre12.g494050 | ribosomal protein L9                               | gi 159484990 | 22 kDa | 2  |
| RPL7                                  | Cre12.g537800 | ribosomal protein L7                               | gi 159469644 | 30 kDa | 2  |
| RPS15                                 | Cre08.g360900 | ribosomal protein S15                              | gi 159475964 | 17 kDa | 2  |
| PRPL19                                | Cre17.g734450 | plastid ribosomal protein L19                      | gi 159469822 | 17 kDa | 2  |
| <b>Translation factor</b>             |               |                                                    |              |        |    |
| EEF1A3                                | Cre06.g263450 | eukaryotic translation elongation factor 1 alpha 1 | gi 159476938 | 51 kDa | 17 |
| EFG8                                  | Cre06.g259150 | elongation factor Tu                               | gi 41179007  | 46 kDa | 6  |
| EIF3G                                 | Cre06.g269450 | eukaryotic translation initiation factor           | gi 159476822 | 31 kDa | 3  |
| EFG2                                  | Cre12.g516200 | elongation factor 2                                | gi 159490505 | 94 kDa | 2  |
| HEL30                                 | Cre06.g298650 | eukaryotic initiation factor 4A-like protein       | gi 159466510 | 47 kDa | 4  |
| <b>Cytoskeleton</b>                   |               |                                                    |              |        |    |
| TUB1                                  | Cre12.g542250 | beta tubulin 2                                     | gi 159471706 | 50 kDa | 11 |
| TUA2                                  | Cre04.g216850 | alpha tubulin 1                                    | gi 159467393 | 50 kDa | 9  |
| ACT1                                  | Cre13.g603700 | actin                                              | gi 159482014 | 42 kDa | 3  |
| <b>ATP synthase</b>                   |               |                                                    |              |        |    |
| mATP2                                 | Cre17.g698000 | ATP synthase subunit beta, chloroplastic           | gi 226698718 | 52 kDa | 9  |
| ATP2                                  | Cre17.g698000 | beta subunit of mitochondrial ATP synthase         | gi 159466892 | 62 kDa | 9  |
| ATP1A                                 | Cre02.g116750 | ATP synthase CF1 alpha subunit                     | gi 213517431 | 55 kDa | 7  |
| ATPG                                  | Cre11.g481450 | CF0 ATP synthase subunit II precursor              | gi 159478483 | 22 kDa | 2  |
| ASA1                                  | Cre07.g340350 | mitochondrial F1F0 ATP synthase associated protein | gi 159468466 | 63 kDa | 3  |
| ATP1A                                 | Cre02.g116750 | mitochondrial F1F0 ATP synthase, alpha subunit     | gi 159483185 | 62 kDa | 2  |
| ASA2                                  | Cre09.g415550 | mitochondrial F1F0 ATP synthase associated protein | gi 159477287 | 48 kDa | 4  |
| <b>Photosynthesis related protein</b> |               |                                                    |              |        |    |
| PSBP1                                 | Cre12.g550850 | Oxygen-evolving enhancer protein 2                 | gi 131389    | 26 kDa | 9  |
| PsbB                                  | Cre09.g416200 | photosystem II 47 kDa protein                      | gi 213517415 | 56 kDa | 8  |
| PSBQ                                  | Cre08.g372450 | oxygen evolving enhancer protein 3                 | gi 159486609 | 22 kDa | 8  |
| PSBO                                  | Cre09.g396213 | oxygen-evolving enhancer protein 1                 | gi 159473144 | 31 kDa | 8  |
| PsbC                                  | Cre09.g388356 | photosystem II 44 kDa protein                      | gi 41179065  | 51 kDa | 5  |
| PSAF                                  | Cre09.g412100 | photosystem I reaction center subunit III          | gi 159477399 | 24 kDa | 4  |

|                                |               |                                                      |              |         |   |
|--------------------------------|---------------|------------------------------------------------------|--------------|---------|---|
| PsaB                           | Cre17.g702500 | photosystem I subunit PsaB                           | gi 41179048  | 82 kDa  | 3 |
| PETO                           | Cre12.g558900 | cytochrome b6f complex subunit V                     | gi 159489663 | 20 kDa  | 2 |
| D2                             | Cre07.g317201 | photosystem II protein D2                            | gi 225115    | 41 kDa  | 3 |
| PSAD                           | Cre05.g238332 | photosystem I reaction center subunit II             | gi 159479282 | 21 kDa  | 2 |
| CGLD37                         | Cre09.g392350 | glycine-rich RNA-binding protein                     | gi 159472653 | 16 kDa  | 5 |
| CPLD20                         | Cre01.g000900 | predicted protein                                    | gi 159484580 | 46 kDa  | 3 |
| ASC1                           | Cre01.g013700 | predicted protein                                    | gi 159462440 | 28 kDa  | 2 |
| RCA1                           | Cre04.g229300 | rubisco activase                                     | gi 159468147 | 45 kDa  | 4 |
| PHT1                           | Cre03.g199000 | phototropin                                          | gi 159470479 | 81 kDa  | 2 |
| <b>Lipid metabolism</b>        |               |                                                      |              |         |   |
| FAB2                           | Cre17.g701700 | plastid acyl-ACP desaturase                          | gi 159466822 | 45 kDa  | 7 |
| ACX2                           | Cre12.g519100 | acetyl-CoA carboxylase                               | gi 159477697 | 54 kDa  | 3 |
| <b>Chaperon</b>                |               |                                                      |              |         |   |
| HSP70A                         | Cre08.g372100 | heat shock protein 70A                               | gi 159486599 | 71 kDa  | 2 |
| HSP70B                         | Cre06.g250100 | heat shock protein 70B                               | gi 1225970   | 72 kDa  | 6 |
| CPN60B2                        | Cre07.g339150 | chaperonin 60B2                                      | gi 159468684 | 62 kDa  | 2 |
| RUBA                           | Cre04.g231222 | chaperonin 60A                                       | gi 159491478 | 62 kDa  | 4 |
| <b>Nucleotide metabolism</b>   |               |                                                      |              |         |   |
| PNBP                           | Cre06.g269050 | pyridine nucleotide binding protein                  | gi 159476278 | 75 kDa  | 4 |
| ANT1                           | Cre09.g386650 | adenine nucleotide translocator                      | gi 159474120 | 34 kDa  | 4 |
| AAA1                           | Cre08.g358526 | plastidic ADP/ATP translocase                        | gi 159491564 | 62 kDa  | 3 |
| <b>Starch metabolism</b>       |               |                                                      |              |         |   |
| AGP1                           | Cre13.g567950 | ADP-glucose pyrophosphorylase large subunit          | gi 159470605 | 55 kDa  | 4 |
| GAD1                           | Cre03.g169400 | UDP-D-glucuronic acid decarboxylase                  | gi 159491066 | 37 kDa  | 3 |
| SBP1                           | Cre03.g185550 | sedoheptulose-1,7-bisphosphatase                     | gi 159467635 | 42 kDa  | 3 |
| PRK1                           | Cre12.g554800 | phosphoribulokinase                                  | gi 159471788 | 42 kDa  | 3 |
| <b>Anoxia</b>                  |               |                                                      |              |         |   |
| PFL1                           | Cre01.g044800 | pyruvate-formate lyase                               | gi 159462978 | 91 kDa  | 4 |
| ADH1                           | Cre17.g746997 | aldehyde-alcohol dehydrogenase                       | gi 92084840  | 102 kDa | 4 |
| ATO1                           | Cre17.g723650 | acetyl-CoA acyltransferase                           | gi 159478266 | 47 kDa  | 3 |
| FUM1                           | Cre06.g254400 | fumarate hydratase                                   | gi 159477070 | 63 kDa  | 5 |
| GAP1                           | Cre12.g485150 | Glyceraldehyde-3-phosphate dehydrogenase             | gi 1346064   | 37 kDa  | 3 |
| ALS2                           | Cre01.g055453 | acetolactate synthase                                | gi 159484278 | 52 kDa  | 3 |
| <b>Histone</b>                 |               |                                                      |              |         |   |
| HFO11                          | Cre06.g266600 | histone H4                                           | gi 159464880 | 11 kDa  | 3 |
| HTA17                          | Cre12.g505550 | histone H2A                                          | gi 159464886 | 14 kDa  | 2 |
| <b>Mitochondria metabolism</b> |               |                                                      |              |         |   |
| QCR2                           | Cre12.g509750 | mitochondrial processing peptidase alpha subunit     | gi 159465665 | 50 kDa  | 3 |
| COX90                          | Cre16.g691850 | cytochrome c oxidase subunit                         | gi 159482474 | 12 kDa  | 2 |
| QCR7                           | Cre06.g262700 | ubiquinol:cytochrome c oxidoreductase 14 kDa subunit | gi 159476418 | 14 kDa  | 2 |
| <b>Various metabolism</b>      |               |                                                      |              |         |   |
| GAP3                           | Cre01.g010900 | glyceraldehyde-3-phosphate dehydrogenase             | gi 159463282 | 40 kDa  | 5 |
| CIS2                           | Cre03.g149100 | citrate synthase                                     | gi 159474920 | 55 kDa  | 5 |

|                            |               |                                                       |              |         |    |
|----------------------------|---------------|-------------------------------------------------------|--------------|---------|----|
| AST1                       | Cre09.g387726 | aspartate aminotransferase                            | gi 159473837 | 47 kDa  | 6  |
| MES1                       | Cre03.g180750 | cobalamin-independent methionine synthase             | gi 159489910 | 87 kDa  | 12 |
| PRX2                       | Cre02.g114600 | 2-cys peroxiredoxin                                   | gi 159483223 | 22 kDa  | 4  |
| APR1                       | Cre12.g517150 | adenylylphosphosulfate reductase                      | gi 159477975 | 46 kDa  | 3  |
| IDH2                       | Cre02.g143250 | NAD-dependent isocitrate dehydrogenase                | gi 159473471 | 39 kDa  | 2  |
| MAS1                       | Cre03.g144807 | malate synthase                                       | gi 159475042 | 61 kDa  | 2  |
| ACH1                       | Cre01.g042750 | aconitate hydratase                                   | gi 159462944 | 86 kDa  | 2  |
| MAP                        | Cre06.g254917 | minus agglutinin protein                              | gi 159477066 | 255 kDa | 2  |
| SHMT1                      | Cre16.g664550 | serine hydroxymethyltransferase                       | gi 159486853 | 57 kDa  | 2  |
| <b>Signal transduction</b> |               |                                                       |              |         |    |
| TEF2                       | Cre12.g497300 | calcium sensing receptor                              | gi 46093489  | 39 kDa  | 5  |
| NOP58                      | Cre10.g441400 | nucleolar protein, component of C/D snoRNPs           | gi 159464245 | 55 kDa  | 2  |
| MAPK6                      | Cre12.g508900 | mitogen-activated protein kinase 6                    | gi 159465279 | 43 kDa  | 2  |
| CDPK1                      | Cre17.g705000 | calcium-dependent protein kinase 1                    | gi 159466768 | 67 kDa  | 2  |
| CAV8                       | Cre12.g532350 | voltage-gated Ca <sup>2+</sup> channel, alpha subunit | gi 159469522 | 471 kDa | 2  |
| <b>Unknown protein</b>     |               |                                                       |              |         |    |
| Unknown                    | Cre03.g145507 | hypothetical protein                                  | gi 159475228 | 28 kDa  | 5  |
| FAP24                      | Cre02.g081050 | flagellar associated protein                          | gi 159487357 | 57 kDa  | 5  |
| Unknown                    | no ID         | Chain A, N153q Mutant Of Cytochrome F                 | gi 10121062  | 27 kDa  | 4  |
| HEL47                      | Cre10.g427700 | predicted protein                                     | gi 159489124 | 63 kDa  | 3  |
| TEF10a                     | Cre03.g146167 | hypothetical protein                                  | gi 159474984 | 25 kDa  | 3  |
| Unknown                    | Cre02.g112150 | hypothetical protein                                  | gi 159483731 | 35 kDa  | 3  |
| Unknown                    | Cre03.g197450 | predicted protein                                     | gi 159469995 | 132 kDa | 2  |
| Unknown                    | Cre06.g263250 | predicted protein                                     | gi 159476406 | 65 kDa  | 2  |

Note: <sup>1</sup> represents protein molecular weight; <sup>2</sup> represents the numbers of hits from the pull-down assay.

## Supplemental References

1. Xie Z, Merchant S (1996) The plastid-encoded *ccsA* gene is required for heme attachment to chloroplast c-type cytochromes. *J Biol Chem* 271(9):4632-4639.
2. Yang W, *et al.* (2014) Alternative acetate production pathways in *Chlamydomonas reinhardtii* during dark anoxia and the dominant role of chloroplasts in fermentative acetate production. *Plant Cell* 26(11):4499-4518.
3. Gibson DG, *et al.* (2009) Enzymatic assembly of DNA molecules up to several hundred kilobases. *Nat Methods* 6(5):343-345.
4. Rasala BA, *et al.* (2013) Expanding the spectral palette of fluorescent proteins for the green microalga *Chlamydomonas reinhardtii*. *Plant J* 74(4):545-556.
5. Takahashi H, Iwai M, Takahashi Y, Minagawa J (2006) Identification of the mobile light-harvesting complex II polypeptides for state transitions in *Chlamydomonas reinhardtii*. *Proc Natl Acad Sci U S A* 103(2):477-482.
6. Radmer RJ, Kok B (1976) Photoreduction of O<sub>2</sub> primes and replaces CO<sub>2</sub> assimilation. *Plant Physiol* 58(3):336-340.
7. Heinnickel ML, *et al.* (2013) Novel thylakoid membrane GreenCut protein CPLD38 impacts accumulation of the cytochrome b6f complex and associated regulatory processes. *J Biol Chem* 288(10):7024-7036.
8. Peden EA, *et al.* (2013) Identification of global ferredoxin interaction networks in *Chlamydomonas reinhardtii*. *J Biol Chem* 288(49): 35192-35209.
9. Merchant SS, *et al.* (2007) The *Chlamydomonas* genome reveals the evolution of key animal and plant functions. *Science* 318(5848):245-250.



**Genomic DNA sequence of the *fdx5* mutant.** The blue uppercase letters represent UTR regions, the red uppercase letters represent exons, and the black uppercase letters represents intron. The lowercase letters represent the insertion cassette.

ATTACACAGCAGTTTCAGGCATTGCCTAACAGCCTTACCTCCAAACCCTTGCCCCGACCTGTCCGTCGC  
GACTCTTCCGAAAGAATGCTGTGCGCGCGCTCCCAGCTGGTCTGCAAGCCTGTGAAGGCTGCTCGCGC  
CTCTCGCGCTACCGTCAAGGTGCGCACCGACCGGTATCGCGTTCAGGTTGAGCAATCAAGTCGCCGCA  
AGCCAGGGTTTTCGCTTTGGTCGCTGTGAGGCTCCGGGGCTATTCGCTGGTATCCACTATGATGTCTC  
GATGTGCAATTGATTGGGCGCGGTCTGTGAGGGCTCTTAGTGGAAGCTGCCAAACCATGCAAGCATA  
AAGCGGCGCCGGTGCCTTTTTACGTGCAGTAAAAGCGCGCAGTGAGCGCTGTGACGCGTTCAGCTTG  
CATCAATTCCTGACATAATCCTTCGCCTATCGCGTTCGCCCTGCCGTGCAGGTGCAAGCCTtgtgtggaat  
tgtgagcggataacaattcacacaggaaacagctatgaccatgattacgccaagcgcgaatfaaccctactaaaggaacaaaagctgggtaccggcc  
ccccctcgagcacacacctgtcagaaacagctcgcgaacgctctccctcaccggcagccccgcagccctttgccccttctagggcaccgcagggacca  
ggcgtctcagcatgctcaacaaccgtaactcgtgcagcgggtgcccctgtgctgggtgacgcttggaaagcgcagcgaagacgaagggcgagcagggc  
gctggctgtcgaagggctcgcgcagctcgggtgccccttctccacgcgcctccacactaccgatcgctgaagggcaggcaaatgctcatgtttgccga  
actcggagtcctfaaaaagccttctgtcgtcgtccgagacatgttagcagatcgagtgccacttctcagcgcctcggccccatattcggacgcaattg  
tcattgtagcacaattggagcaaatctggcgagggcagtaggctttaagttgcaagggcagagagcaaaagtgggacgcggcgtgattattggtattacgca  
cgccccggcgcttagcggccctccccaggccaggacgattatgatacaatattgttgcgtcgggcaactcgtgcgagggctcctcgggctggggaggg  
ggatctgggaattggaggtacgaccgagatgctcgtcggggggagggttctcgcgagcaagccaggggttaggtgttgcctcttactcgtgtgcattct  
aggaccccactgctactcaacaagccatattgacgatgctgtcgtcactcgggggtggtatccccgtgtgagtggtgtgtggaggtggggcct  
cgggggctggtgttatcgcttcgggggtggtgggggggaggtgtttgtaaggtggcagctctggggggcggggtgggctgttgggtgaggtgagcggctg  
gtgtggtggcggagggtggggattcccgtacctggtgtgtggagggtggtggggacgagagggctgcctggttggtaccgaagcgggttcggggcgctcgg  
ccagtcgcgggtggcgcggggagcagcggctggagctggcggtggcgctcgcggggctcgtcgttcgctgcacgcgctggactgggagcgggtgctcgttcg  
atcgcagctctcgggtgacggtgcccagggcggccctgctgtcgtgaagggagcgtcactggaggatcggacgaggagcggaaaggggtggtcgggg  
gagcggcttctcgcgagctggagcggactcggcctgaggacgagatcggcgggttccacggctacctgtgccccgacaactgctcgcacccctgta  
cctgcgaggtgacgggctgatcagctggggcgggctcggcctgaggaccggcactcagatcgcgctggtcgtcgcgagctggccccagaggaggac  
ccgtggttcgggcccaggtgttccgcggcttctcggggagtagggcgcggggtgggatggggcggtatcggaggaaaagctggcgtttaccggctgttgg  
acgagttctctgagatatacaattctcaggtcgggacatccccaccagggggcgggggatgttctgggcccagtgaaaagGGTCCGCCCCGAC  
GAGGCGCTGTTTCGACGCCGTGGAGCGCTACGATGTGGACCTGCCTACCTGTGCCGCACTGGTGAGAG  
TTCGTGTGTTCCGCACACATAACGCAGAAGCGTGGCACACACGGTTGTTGGGCAGCCCCGCTGCAAGTG  
CACCAGTGCCCCTTACTCCCTTCCGACCCACATCCTGACCCTCCCCGCCCTCCTCTCCTCCCCAACCC  
CAGGCACCTGCGGCACGTGCGCGGGCCGTGTGCAGGAGGGCCAGGTGGAGCTCAAGGGTCAGCACAT  
CCTGGACCCCGATCAGGTCAAGGCCGGCTTCACTCTATGTGCTCCGCTACCCCGCTCCGACTGCAC  
CATCCTCACGCACCAGGTGAGGAGAGGGAAACAGGGATTGGAAGAGATACGGCGCATCCGTGTGTG  
CGGCTTGTGCGTGTGACCAGTGGTGCAGTGGCTGATGTGGGGTAAGGTGGGGTCGCGAAAGATGGAT  
GCGATGGCCAGGGGTCGCTGCTGGGCTGCTGCTCGAACGGCCTGCAACCGCACGTGCGTGTCTTCCG  
GAGCCGCACCTGGCCGCGCCACACGTGCCTGTTACTCCAAGTCAATTGACGCCTCCGCCCCCCTGTG  
CTCCCCGCCCTTCCCTCCCCCTTACGAGGAGCGCCTGCACACCTGCGAGTACGGCAAGCACAGTA  
AGCGGCACACACACGCCGCACGTACCATTCTGTGTCAGCGTCCGCTGCCTGGCGCCTGCTTGGAGCTAG  
AGGCGGGCGATGGCGCAGTGGCACCAACATGACTCGTGACTCATAGGACAACATTGTTACTTTATCAC  
GCAACGGAGGGGCATAGCTACGCTGGACAGGCTAGGCACGCACGACTCCTGCGCTGATTTGACTCCGT  
AGGTAGATGAATGACTTCCACACAGTACCGGTATTGAACACCTTGACTCGCGCCTTGACGCATTGTTTT  
GCCCCACATATACGGGGCAGGAGTGGGTGGTGGTGAAGCCGCCGCGCTCCGTGATTTTTGACGTTT  
TGACACGCGCTTGAAGAGTCAAGAGTGGCTGCAGCAGGATGCGAAGCATGTATGGCGGGGGTGACT  
GAGGTAGGGCCGTAGAGGCAGGTTGACCGTTAGGCCTTAGGACGTCATGCATTGCCAAATGCCATACA  
TGAGTGGGGCACGTGAGGATTGGTTGAGGATGGGACTGATTGAGGCACACATAACCGTAGGCAGGTGA  
TTATAATAACGGAGCGACTGCTCCTGGGTAGCGTGTGTGTGTGGCAAGGACACGGGTATGTATGGCTC  
TGGTGTGGCTGAGTGGCGCCCCGCTAGCAAGCGGGGCTGCTGGAGGCGACTGGGTACCCGCGTGTCT  
TACTGCCGCAGAGAAGATTAATCAAGCGATGAATTGGGTACGGCTAGCTGCAATGCAGCAGCTTC  
ATGTAACCCCCAACTATGG

CDS sequence of *fdx5* mutant. The red uppercase letters represent the exons, and the lowercase letters represent the insertion cassette.

ATGCTGTGCGCGCTCCAGCTGGTCTGCAAGCCTGTGAAGGCTGCTCGCGCCTCTCGCGCTACCGTC  
AAGGTGCAGGCCTgtgtggaattgtgagcggataacaatttcacacaggaacagctatgaccatgattacgccaagecgcgaattaaccctact  
aaaggaacaaaagctgggtaccgggccccctcgagcacacactgtcagaaacagtcctcgccacgtctccctctcagcgcgacccccgagccctt  
tgcccttctagccaccgacaggaccaggcctctcagcatgectcaacaaccgtaactcgtgccagcgggtcccttgtgtggtgatccttgaagcgc  
atgcaagacgaagggcggagcagggcctggtctgaagggctcgcgccagttcgggtgcttctccacgcgcgctccacactaccgatcggg  
aaggcaggcaaatgctcatgttgcgcaactcggagtcctaaaaagcgccttctgtcgtcgttccgagacatgttagcagatcgcagtgccaccttctga  
cgcctcggccccatattcggacgcaattgtcattgtagcacaattggagcaaatctggcagggcagtaggctttaaagttgcaaggcgagagagcaagtg  
ggacgcggcgtgattattggtattacgcgacggccccggcgttagcggccctccccaggccaggacgattatgtatcaatattgtgctcgggcactc  
gtcggagggctcctcgggctggggaggggatctgggaattggaggtacgaccgagatggcttgcctggggggagggttctcgcgagcaagccagggt  
agggttgcgctcttactcgtgtgcattctaggacccccactgtactcaacaagccataggacgatgcgttgcgtcactgcggggtcggtatcccggt  
gtgagtggttgtgtgaggatggggcctcggggctggtgttattcggctcgggggtggggcgggagttgttcaaggtggcagctctggggcggg  
gtggcttgttgggtgaggctgagcggctggtgtggtggcggaggtgggattccctacctcgtgtgtgagggtggtggggacgagagggtcgcctggt  
ggtcaccgaagcgggtccggggcgtccggcagtgccgggtggccgaggcagcggctggacgtggcgggtggcgtcgcggggctcgtcgtcgtgca  
cgcgtggactgggagcgggtgctcgttcgacgcagtcctcgggtgacgggtccgcaggcggccccgtcgtcgtcgaagggagcgtcactggaggatcg  
gacgaggagcggaaaggggtggcgggggagcggcttctcgcgagctggagcggactcggcctcggacgaggatctggcgggttccacggtcactgtg  
ccggacaacgtgctcgcaccctctacctcggaggtgaccggctgatcagctggggcgggtcggcctcggacggcactcggatctcgcgtggtg  
ctgcgcgagetggcccagaggaggaccctggttcgggcggaggttccggcggcttctcggggagtagggcgcgggtgggatggggcggatcggga  
ggaaaagctggcgtttaccggctgttggacgagttcttctgagatcgaattctcaggtcgggacatccccgaccagggcggcggggatgttctgggccc  
atggaaagGGTCGGCCCCGACGAGGCGCTGTTCGACGCCGTGGAGCGCTACGATGTGGACCTGCCCTACC  
TGTGCCGCACTGGCACCTGCGGCACGTGCGCGGGCCGTGTGCAGGAGGGCCAGGTGGAGCTCAAGGG  
TCAGCACATCTGGACCCCGATCAGGTCAAGGCCGGCTTCATCCTCATGTGCTCCGCCTACCCCGCTC  
CGACTGCACCATCCTACGCACCAGGAGGAGCGCCTGCACACCTGCGAGTACGGCAAGCACCAGTAA
